# Supplementary material
Source: publisher figshare collection journal article supplement (https://gsajournals.figshare.com/ndownloader/files/18901730)
Supplement: Supplementary file 1 [file 18901730]

## Sheet: Table S1
Table S1 List of oligonucleotides used in this study
Name	Sequence
pBad_fwd	ATGCCATAGCATTTTTATCC
pBad_rev	GATTTAATCTGTATCAGG
DsrA_fwd	AATTTTTTAAGTGCTTCTTGCTTAAG
DsrA_fwd_randomized	N10-AATTTTTTAAGTGCTTCTTGCTTAAG
MicF_fwd	CGTCATTCATTTCTGAATGTCTG
MicF_fwd_randomized	N10-CGTCATTCATTTCTGAATGTCTG
Spot42_fwd	ATTTGGCTGAATATTTTAGCCGC
Spot42_fwd_randomized	N10-ATTTGGCTGAATATTTTAGCCGC
Sart_rev	N20-CTCGAGTATGGAGAAACAGTAGAGAG

## Sheet: Table S2
Table S2. The preliminary (222) gene targets. All the gene targets identified from the 31 sRNA randomized sequences and their putative mRNA complementarity hits. The hit matches are based on IntaRNA, Target RNA and RNA predator matches (Mann et al. 2017; Kery et al. 2014; Eggenhofer et al. 2011).
S. No	Native Scaffold	Randomized Sequence	Target gene hit and their respective function
1	DsrA	ttctctcgtcggactgaacgtggagctgg	uvrC ATPase and DNA damage recognition protein of nucleotide excision repair excinuclease UvrABC
			exoD exonuclease V (RecBCD complex); beta subunit
			topB DNA topoisomerase III
			emrA multidrug efflux system
			ampC penicillin-binding protein beta-lactamase intrinsically weak
			seqA negative modulator of initiation of replication
			tolC transport channel
			rpoN RNA polymerase sigma 54 (sigma N) factor
			recO gap repair protein
			minC Ftsz ring
			umuD translesion error-prone DNA polymerase V subunit RecA-activated auto-protease
2	DsrA	ttgtacctgctttcgatacgactttcatc	mtlR mannitol operon repressor
			tolA membrane anchored protein in TolA-TolQ-TolR complex
3	DsrA	gaattcggaccatgataccactgagttt	ydhK putative efflux protein (PET) component of YdhJK efflux pump
			yoeB toxin of the YoeB-YefM toxin-antitoxin system
			kdpA potassium translocating ATPase subunit A
			yhhX putative oxidoreductase
			zipA FtsZ stabilizer
			mutH methyl-directed mismatch repair protein
			recJ ssDNA exonuclease; 5' 3' specific
			rpoC RNA polymerase beta prime subunit
			rpoN RNA polymerase sigma 54 (sigma N) factor
			yeeY predicted DNA binding transcriptional regulator
			polA 5' to 3' DNA polymerase and 3' to 5'/5' to 3' exonuclease
4	DsrA	gagaccgtgac	zipA FtsZ stabilizer
			helD DNA helicase IV
			ygfI putative DNA-binding transcriptional regulator
			rpoH RNA polymerase sigma 32 (sigma H) factor
			cho or ydjQ endonuclease of nucleotide excision repair
5	DsrA	tcctaaggctttatctctga	dut deoxyuridinetriphosphatase
			rssB PcnB-degradosome interaction factor response regulator
			dcuS sensory histidine kinase in two-component regulatory system with DcuR regulator of anaerobic fumarate respiration
			evgA response regulator in two-component regulatory system with EvgS
			rpoE RNA polymerase sigma E factor
			rpoN RNA polymerase sigma 54 (sigma N) factor
			dnaA chromosomal replication initiator protein DnaA DNA-binding transcriptional dual regulator
			recB exonuclease V (RecBCD complex) beta subunit
			dksA DNA binding transcriptional regulator of rRNA transcription; DnaK suppressor protein
6	DsrA	ccccacactcccacattcaNNcttgtggg	recB exonuclease V (RecBCD complex) beta subunit
			cheY chemotaxis regulator transmitting signal to flagellar motor component
			djlA membrane-anchored DnaK co-chaperone DNA-binding protein
			yacG DNA gyrase inhibitor
			recQ ATP-dependent DNA helicase
			rpoD RNA polymerase sigma 70 (sigma D) factor
			ompR response regulator in two-component regulatory system with EnvZ
			umuC DNA polymerase V; subunit C
7	DsrA	cttgtctcgtac	ydaG putative DNA endonuclease
			dnaC DNA biosynthesis protein
			recC exonuclease V (RecBCD complex); gamma chain
			holD DNA polymerase III; psi subunit
			rpoE RNA polymerase; sigma 24 (sigma E) factor
8	DsrA	tcctaaggctttatctc	dnaA chromosomal replication initiator protein DnaA DNA-binding transcriptional dual regulator
			rpoN RNA polymerase sigma 54 (sigma N) factor
			minC inhibitor of FtsZ ring polymerization
			rpoE RNA polymerase sigma E factor
			recB exonuclease V (RecBCD complex) beta subunit
			rssB PcnB-degradosome interaction factor response regulator
			mdtA multidrug efflux system; subunit A
9	DsrA	cggcgaaatgttgtgg	ypdC putative DNA-binding protein
			rho transcription termination factor
			ydaV Rac prophage; predicted DNA replication protein
			dnaX DNA polymerase III/DNA elongation factor III, tau and gamma subunits
			ligA DNA ligase; NAD(+) dependent
			dnaB replicative DNA helicase
10	DsrA	cgcccggaacgccgccgtgttatcgcatt	holE DNA polymerase III theta subunit
			yacG DNA gyrase inhibitor
			ftsQ Divisome assembly protein; membrane anchored protein involved in growth of wall at septum
			cpxA sensory histidine kinase in two component regulatory system with CpxR
11	DsrA	acttcattgagacagaacg	yjaA stress-induced protein
			kdpE response regulator in two-component regulatory system with KdpD
			ttdB L-tartrate dehydratase beta subunit
			pinQ Qin prophage putative site-specific recombinase
			proC pyrroline-5-carboxylate reductase NAD(P)-binding
			pepD aminoacyl-histidine dipeptidase (peptidase D)
			atoC fused response regulator of ato operon in two-component system with AtoS: response regulator/sigma54 interaction protein
			topA DNA topoisomerase I; omega subunit
			hybC hydrogenase 2 large subunit
12	DsrA	caactggtgaa	smrB putative DNA endonuclease
			atoC fused response regulator of ato operon in two-component system with AtoS: response regulator/sigma54 interaction protein
			xthA exonuclease III
			ypdA predicted sensory kinase in two component system with YpdB
			rbbA fused ribosome associated ATPase ATP binding protein/ATP binding protein/predicted membrane protein
			uvrC ATPase and DNA damage recognition protein of nucleotide excision repair excinuclease UvrABC
			cho or ydjQ endonuclease of nucleotide excision repair
			zapB septal ring assembly factor; stimulates cell division
			polA 5' to 3' DNA polymerase and 3' to 5'/5' to 3' exonuclease
13	MicF	tacaacccttgccgagaagctagtgttat	seqA negative modulator of initiation of replication
			recE Rac prophage exonuclease VIII 5' to 3' specific dsDNA exonuclease
			zapC FtsZ stabilizer
			smf DNA recombination-mediator A family protein
			ruvC component of RuvABC resolvasome endonuclease
14	MicF	tccccttcacgggtgcaacgggccaatgg	uhpA response regulator in two-component regulatory system wtih UhpB
			sbmC DNA gyrase inhibitor
			yfjQ CP4-57 prophage uncharacterized protein
			yafG CP4-6 prophage conserved protein
			hybC hydrogenase 2 large subunit
			yacG DNA gyrase inhibitor
			priA Primosome factor n' (replication factor Y)
			minD membrane ATPase of the MinC MinD MinE system
			recT Rac prophage; recombination and repair protein
			rpoD RNA polymerase; sigma 70 (sigma D) factor
			dnaE DNA polymerase III alpha subunit
15	MicF	gcagatctccctagatgcctagttaggtg	rpoE RNA polymerase sigma E factor
			priB primosomal protein N
			zapC FtsZ stabilizer
16	MicF	tcctcacccgatgtataaaacgtcccaat	yhiM acid resistance protein inner membrane
			ftsK DNA translocase at septal ring sorting daughter chromsomes
17	MicF	aactcgccagtgactacgctgttaggag	ftsY Signal Recognition Particle (SRP) receptor
			emrB multidrug efflux system protein
			polB DNA polymerase II
			dnaN DNA polymerase III; beta subunit
18	MicF	ctcataaactccgtctccaggattagggt	recD exonuclease V (RecBCD complex) alpha chain
			arfA alternate ribosome-rescue factor A
			uvrY response regulator in two-component regulatory system with BarA
			yneJ putative DNA-binding transcriptional regulator
			envY porin thermoregulatory transcriptional activator
			glnG fused DNA binding response regulator in two component regulatory system with GlnL response regulator/sigma54 interaction protein
			narX sensory histidine kinase in two component regulatory system with NarL
			recE Rac prophage exonuclease VIII 5' to 3' specific dsDNA exonuclease
			recJ ssDNA exonuclease; 5' 3' specific
			rep DNA helicase and single-stranded DNA-dependent ATPase
			priB primosomal protein N
19	MicF	gacactaaatacgaatgggtggatttact	rep DNA helicase and single-stranded DNA-dependent ATPase
			pyrB aspartate carbamoyltransferase catalytic subunit
			dnaX DNA polymerase III/DNA elongation factor III, tau and gamma subunits
			uvrC excinuclease UvrABC endonuclease subunit
			holC DNA polymerase III chi subunit
			dnaA chromosomal replication initiator protein DnaA DNA-binding transcriptional dual regulator
			uvrB exision nuclease of nucleotide excision repair DNA damage recognition component
			rsgA ribosome small subunit dependent GTPase A
			sbcC exonuclease; dsDNA; ATP dependent
			rep DNA helicase and single-stranded DNA-dependent ATPase
			cpxA sensory histidine kinase in two component regulatory system with CpxR
20	MicF	accagggcggtg	dnaT DNA biosynthesis protein (primosomal protein I)
			cheA fused chemotactic sensory histidine kinase in two-component regulatory system with CheB and CheY: sensory histidine kinase/signal sensing protein
			recD exonuclease V (RecBCD complex) alpha chain
			rpoC RNA polymerase beta prime subunit
			priC primosomal replication protein N''
			holD DNA polymerase III psi subunit
			dinB DNA polymerase IV
			sbcC exonuclease; dsDNA; ATP dependent
			recE Rac prophage exonuclease VIII 5' to 3' specific dsDNA exonuclease
21	MicF	gacactaaatacgaatgggtggatttact	zapC FtsZ stabilizer
			recE Rac prophage exonuclease VIII 5' to 3' specific dsDNA exonuclease
			tus inhibitor of replication at Ter; DNA binding protein
			dnaX DNA polymerase III/DNA elongation factor III; tau and gamma subunits
			sbcC exonuclease; dsDNA; ATP dependent
			rep DNA helicase and single-stranded DNA-dependent ATPase
22	MicF	cagttctttagcagcgcacaggcgtgaca	ompR response regulator in two-component regulatory system with EnvZ
			yfcJ putative arabinose efflux transporter
			rpoB RNA polymerase beta subunit
			cheB fused chemotaxis regulator protein glutamate methylesterase in two component regulatory system with CheA
			barA hybrid sensory histidine kinase; in two component regulatory system with UvrY
			uvrA ATPase and DNA damage recognition protein of nucleotide excision repair excinuclease UvrABC
			dnaT DNA biosynthesis protein (primosomal protein I)
			torT periplasmic sensory protein associated with the TorRS two-component regulatory system
			recD exonuclease V (RecBCD complex) alpha chain
			arcA DNA binding response regulator in two component regulatory system with ArcB or CpxA
			rep DNA helicase and single-stranded DNA-dependent ATPase
			rnt ribonuclease T (RNase T)
			mutL methyl directed mismatch repair protein
			ftsK DNA translocase at septal ring sorting daughter chromsomes
23	MicF	atatacatggagttt	dnaT DNA biosynthesis protein (primosomal protein I)
			rpoN RNA polymerase sigma 54 (sigma N) factor
			recE Rac prophage exonuclease VIII 5' to 3' specific dsDNA exonuclease
			barA hybrid sensory histidine kinase; in two component regulatory system with UvrY
			rpoB RNA polymerase beta subunit
			uvrD DNA-dependent ATPase I and helicase II
			dnaT DNA biosynthesis protein (primosomal protein I)
24	MicF	ctaccagaaccgttacgctctaaacaat	tolQ membrane spanning protein in TolA-TolQ-TolR complex
			sapB antimicrobial peptide transport ABC transporter permease
			dnaQ DNA polymerase III epsilon subunit
			rpoZ RNA polymerase omega subunit
			ftsA ATP-binding cell division FtsK recruitment protein
			torL response regulator inhibitor for tor operon
25	MicF	gctatcatcattaactttatttattac	seqA negative modulator of initiation of replication
			obgE GTPase involved in cell partioning and DNA repair
			yddM putative DNA-binding transcriptional regulator
			ydjE putative transporter. putative MFS sugar transporter membrane protein
			recA DNA strand exchange and recombination protein with protease and nuclease activity
			rapA RNA polymerase associated helicase protein (ATPase and RNA polymerase recycling factor)
			recB exonuclease V (RecBCD complex) beta subunit
			dcuS sensory histidine kinase in two-component regulatory system with DcuR regulator of anaerobic fumarate respiration
			cpxR response regulator in two-component regulatory system with CpxA
26	MicF	accctacgaacagtgcaat	yihP putative 23-dihydroxypropane-1-sulphonate exporter membrane protein
			mdtC multidrug efflux system subunit C
			torT periplasmic sensory protein associated with the TorRS two-component regulatory system
			yehW putative ABC transporter permease
			rnr exoribonuclease R; RNase R
			uvrB exision nuclease of nucleotide excision repair DNA damage recognition component
27	MicF	ttaaggaaaaaatgtttNNNNgggctcgt	ftsK DNA translocase at septal ring sorting daughter chromsomes
			ygbL putative class II aldolase
			cydD glutathione/cysteine ABC transporter export permease/ATPase
			holE DNA polymerase III theta subunit
			holB DNA polymerase III; delta prime subunit
			rapA RNA polymerase associated helicase protein (ATPase and RNA polymerase recycling factor)
28	MicF	ggtagtagactg	hybC hydrogenase 2 large subunit
			priA Primosome factor n' (replication factor Y)
			xseA exonuclease VII large subunit
			topB DNA topoisomerase III
			rpoH RNA polymerase sigma 32 (sigma H) factor
			rpoB RNA polymerase beta subunit
			xthA exonuclease III
			hybB predicted hydrogenase 2 cytochrome b type component
29	MicF	ctatacagatcatttacaccc	rpoH RNA polymerase sigma 32 (sigma H) factor
			uvrD DNA-dependent ATPase I and helicase II
			uvrC excinuclease UvrABC endonuclease subunit
			cpxR response regulator in two-component regulatory system with CpxA
			fic stationary phase protein; cell division
			ftsP septal ring component that protects the divisome from stress; multicopy suppressor of ftsI(Ts)
			uvrY response regulator in two-component regulatory system with BarA
			ftsQ Divisome assembly protein; membrane anchored protein involved in growth of wall at septum
30	Spot42	ccgtatagaaccacatctgcctggggggg	yhjX pyruvate-inducible inner membrane protein putative transporter
			polA 5' to 3' DNA polymerase and 3' to 5'/5' to 3' exonuclease
			uvrB exision nuclease of nucleotide excision repair DNA damage recognition component
			dnaT DNA biosynthesis protein (primosomal protein I)
			umuD translesion error-prone DNA polymerase V subunit RecA-activated auto-protease
			dnaK chaperone Hsp70; co chaperone with DnaJ
31	Spot42	ggaggggggg	dnaT DNA biosynthesis protein (primosomal protein I)
			torS hybrid sensory histidine kinase in two component regulatory system with TorR
			phoP DNA binding response regulator in two component regulatory system with PhoQ
			narQ sensory histidine kinase in two component regulatory system with NarP (NarL)

## Sheet: Table S3
Table S3 The preliminary 74 candidate genes based on their function among 31 artificial sequences of sRNA and their hybridization with target mRNA. The targeted sequencing identified 36/74 mutants (bold) having gyrA S83L mutation successfully incorporated in them.
S.NO.	Target gene	Function
1	emrA	Multidrug efflux system
2	fic	Stationary phase protein, cell division
3	rep	DNA helicase and single-stranded DNA-dependent ATPase
4	recB	exonuclease V (RecBCD complex) beta subunit
5	recC	exonuclease V (RecBCD complex); gamma chain
6	recD	exonuclease V (RecBCD complex) alpha chain
7	recE	exonuclease VIII 5' to 3' specific dsDNA exonuclease
8	recJ	ssDNA exonuclease; 5' 3' specific
9	recO	gap repair protein
10	recQ	ATP-dependent DNA helicase
11	recT	recombination and repair protein
12	rho	transcription termination factor
13	rnt	ribonuclease T (RNase T)
14	rpoC	RNA polymerase beta prime subunit
15	rpoD	RNA polymerase sigma 70 (sigma D) factor
16	rpoN	RNA polymerase sigma 54 (sigma N) factor
17	ruvC	component of RuvABC resolvasome endonuclease
18	yacG	DNA gyrase inhibitor
19	ypdC	putative DNA-binding protein
20	smrB	putative DNA endonuclease
21	smf	DNA recombination-mediator A family protein
22	seqA	negative modulator of initiation of replication
23	sbmC	DNA gyrase inhibitor
24	sbcC	exonuclease; dsDNA; ATP dependent
25	tus	inhibitor of replication at Ter; DNA binding protein
26	torT	periplasmic sensory protein associated with the TorRS two-component regulatory system
27	tolA	membrane anchored protein in TolA-TolQ-TolR complex
28	tolQ	membrane spanning protein in TolA-TolQ-TolR complex
29	tolC	transport channel
30	topB	DNA topoisomerase III
31	umuC	DNA polymerase V; subunit C
32	uvrD	DNA-dependent ATPase I and helicase II
33	uvrC	excinuclease UvrABC endonuclease subunit
34	xthA	exonuclease III
35	xseA	exonuclease VII large subunit
36	ypdA	predicted sensory kinase in two component system with YpdB
37	yeeY	predicted DNA binding transcriptional regulator
38	ydaG	putative DNA endonuclease
39	ydaV	predicted DNA replication protein
40	yddM	putative DNA-binding transcriptional regulator
41	zipA	FtsZ stabilizer
42	ampC	penicillin-binding protein beta-lactamase intrinsically weak
43	cho	endonuclease of nucleotide excision repair
44	cheB	fused chemotaxis regulator protein glutamate methylesterase in two component regulatory system with CheA
45	cpxA	sensory histidine kinase in two component regulatory system with CpxR
46	cpxR	response regulator in two-component regulatory system with CpxA
47	dnaK	chaperone Hsp70; co chaperone with DnaJ
48	dnaQ	DNA polymerase III epsilon subunit
49	dnaT	DNA biosynthesis protein (primosomal protein I)
50	dinB	DNA polymerase IV
51	emrB	multidrug efflux system protein
52	hybB	predicted hydrogenase 2 cytochrome b type component
53	holE	DNA polymerase III theta subunit
54	holC	DNA polymerase III chi subunit
55	holD	DNA polymerase III; psi subunit
56	helD	DNA helicase IV
57	hybC	hydrogenase 2 large subunit
58	mdtA	multidrug efflux system; subunit A
59	mdtC	multidrug efflux system subunit C
60	minC	inhibitor of FtsZ ring polymerization
61	mtlR	mannitol operon repressor
62	mutL	methyl directed mismatch repair protein
63	ompR	response regulator in two-component regulatory system with EnvZ
64	pinQ	Qin prophage putative site-specific recombinase
65	polB	DNA polymerase II
66	priA	Primosome factor n' (replication factor Y)
67	priB	primosomal protein N
68	priC	primosomal replication protein N''
69	proC	pyrroline-5-carboxylate reductase NAD(P)-binding
70	pyrB	aspartate carbamoyltransferase catalytic subunit
71	rbbA	fused ribosome associated ATPase ATP binding protein/ATP binding protein/predicted membrane protein
72	rnr	exoribonuclease R; RNase R
73	rsgA	ribosome small subunit dependent GTPase A
74	uvrA	ATPase and DNA damage recognition protein of nucleotide excision repair excinuclease UvrABC

## Sheet: Table S4
Table S4 MIC values (ng/ml) of single (Keio knockout mutant) and double mutant (Keio knockout mutant + gyrA S83L mutation) towards Ciprofloxacin.
Target gene	Keio knockout mutant MIC	Double mutant strain MIC (Keio knockout mutant + gyrA S83L mutation)	Effect of the Keio mutation vs. cybC	Effect on S83L background
cybC (Control)	31	1000	1	1
recC	15	500	0.5	0.5
recD	31	500	1	0.5
recJ	31	500	1	0.5
rnt	31	500	1	0.5
rpoN	31	1000	1	1
smrB	31	500	1	0.5
sbmC	15	125	0.5	0.125
tus	7.8	62.5	0.25	0.0625
topB	31	500	1	0.5
umuC	31	500	1	0.5
uvrD	15	125	0.5	0.125
xseA	7.8	62.5	0.25	0.0625
dnaQ	31	500	1	0.5
helD	31	500	1	0.5
priB	31	500	1	0.5
priC	31	500	1	0.5
rnr	15	125	0.5	0.125
uvrA	15	125	0.5	0.125
yeeY	31	500	1	0.5
mtlR	31	500	1	0.5
ydaG	31	500	1	0.5
ydaV	31	500	1	0.5
ompR	15	500	0.5	0.5
cheB	15	125	0.5	0.125
cpxA	31	500	1	0.5
cpxR	31	500	1	0.5
dnaK	31	500	1	0.5
hybB	31	500	1	0.5
emrB	31	125	1	0.125
tolA	31	500	1	0.5
tolQ	7.8	62.5	0.25	0.0625
tolC	15	62.5	0.25	0.0625
minC	15	500	0.5	0.5
zipA	31	1000	1	1
proC	15	500	0.5	0.5
pyrB	31	500	1	0.5

## Sheet: Primary screen
Growth parameters for randomized sRNA constructs - primary screen (Figure 2)
Plasmid	Growth rate	OD	Lag time
Randomized DsrA Plasmid	0.03567	1.09	90
Randomized DsrA Plasmid	0.03084	1.156	51.5
Randomized DsrA Plasmid	0.02927	1.196	71.5
Randomized DsrA Plasmid	0.02895	1.084	61.1
Randomized DsrA Plasmid	0.02872	1.114	51.1
Randomized DsrA Plasmid	0.02984	1.097	71.7
Randomized DsrA Plasmid	0.01914	0.975	70.4
Randomized DsrA Plasmid	0.02459	1.047	70.9
Randomized DsrA Plasmid	0.02725	1.147	61
Randomized DsrA Plasmid	0.02858	1.117	102.3
Randomized DsrA Plasmid	0.02565	1.19	86.2
Randomized DsrA Plasmid	0.02824	0.904	62
Randomized DsrA Plasmid	0.02537	1.183	93.2
Randomized DsrA Plasmid	0.03181	1.114	91.2
Randomized DsrA Plasmid	0.02841	1.134	77.5
Randomized DsrA Plasmid	0.0316	1.066	70.8
Randomized DsrA Plasmid	0.03022	1.092	81.5
Randomized DsrA Plasmid	0.02752	1.092	94.3
Randomized DsrA Plasmid	0.02625	0.979	90.5
Randomized DsrA Plasmid	0.0254	0.979	80.5
Randomized DsrA Plasmid	0.03105	1.216	100.7
Randomized DsrA Plasmid	0.02795	1.172	101.9
Randomized DsrA Plasmid	0.03185	1.157	60.9
Randomized DsrA Plasmid	0.02898	1.138	53.6
Randomized DsrA Plasmid	0.03191	1.251	52.7
Randomized DsrA Plasmid	0.0324	1.164	61.5
Randomized DsrA Plasmid	0.02915	1.133	51.4
Randomized DsrA Plasmid	0.02736	1.073	93.9
Randomized DsrA Plasmid	0.02982	1.069	90.8
Randomized DsrA Plasmid	0.02864	1.086	90.6
Randomized DsrA Plasmid	0.02598	1.03	90.7
Randomized DsrA Plasmid	0.0254	0.976	91.3
Randomized DsrA Plasmid	0.02883	1.168	90.2
Randomized DsrA Plasmid	0.02678	1.062	81.8
Randomized DsrA Plasmid	0.02813	1.117	60.9
Randomized DsrA Plasmid	0.02906	1.105	63.3
Randomized DsrA Plasmid	0.02897	1.169	80.9
Randomized DsrA Plasmid	0.02984	1.097	81
Randomized DsrA Plasmid	0.03094	1.084	80.7
Randomized DsrA Plasmid	0.02788	1.068	75.9
Randomized DsrA Plasmid	0.03024	1.039	61.1
Randomized DsrA Plasmid	0.02786	1.07	62.9
Randomized DsrA Plasmid	0.02251	0.96	81.6
Randomized DsrA Plasmid	0.02268	0.953	72.1
Randomized DsrA Plasmid	0.02968	1.144	50.8
Randomized DsrA Plasmid	0.02909	1.052	92.5
Randomized DsrA Plasmid	0.02745	1.067	71
Randomized DsrA Plasmid	0.02982	1.114	80.7
Randomized DsrA Plasmid	0.02793	1.171	71.9
Randomized DsrA Plasmid	0.02702	1.104	80.2
Randomized DsrA Plasmid	0.03061	1.205	62.4
Randomized DsrA Plasmid	0.03288	1.295	90.5
Randomized DsrA Plasmid	0.03243	1.148	90.2
Randomized DsrA Plasmid	0.00172	0.809	72.2
Randomized DsrA Plasmid	0.02873	1.106	81.5
Randomized DsrA Plasmid	0.02564	1.162	61.4
Randomized DsrA Plasmid	0.02569	0.996	83.7
Randomized DsrA Plasmid	0.03048	1.22	72
Randomized DsrA Plasmid	0.02684	1.005	71.4
Randomized DsrA Plasmid	0.02831	1.055	81.8
Randomized DsrA Plasmid	0.0145	1.073	71.7
Randomized DsrA Plasmid	0.02507	1.019	82.1
Randomized DsrA Plasmid	0.02496	1.015	73.6
Randomized DsrA Plasmid	0.02694	1.023	88.1
Randomized DsrA Plasmid	0.02925	1.057	52
Randomized DsrA Plasmid	0.026	0.993	81.3
Randomized DsrA Plasmid	0.01925	0.895	80.3
Randomized DsrA Plasmid	0.02728	1.058	64.5
Randomized DsrA Plasmid	0.028	1.105	63.1
Randomized DsrA Plasmid	0.01443	0.968	74.8
Randomized DsrA Plasmid	0.02793	1.104	80.5
Randomized DsrA Plasmid	0.0287	1.04	72.6
Randomized DsrA Plasmid	0.02247	1.018	50.3
Randomized DsrA Plasmid	0.0254	0.963	50.6
Randomized DsrA Plasmid	0.0219	0.997	74.1
Randomized DsrA Plasmid	0.02352	1.03	92.4
Randomized DsrA Plasmid	0.03119	1.066	54.3
Randomized DsrA Plasmid	0.01354	0.987	81.8
Randomized DsrA Plasmid	0.02882	0.99	52.4
Randomized DsrA Plasmid	0.01394	0.92	51
Randomized DsrA Plasmid	0.01725	1.084	90.8
Randomized DsrA Plasmid	0.02789	1.035	93.3
Randomized DsrA Plasmid	0.03057	1.04	80.6
Randomized DsrA Plasmid	0.03004	1.079	81
Randomized DsrA Plasmid	0.03088	1.079	80.5
Randomized DsrA Plasmid	0.02751	1.012	90.5
Randomized DsrA Plasmid	0.01681	1.041	51.7
Randomized DsrA Plasmid	0.02318	0.97	80.8
Randomized DsrA Plasmid	0.00807	0.929	80.5
Randomized DsrA Plasmid	0.0283	1.114	64.3
Randomized DsrA Plasmid	0.01721	1.064	61.2
Randomized DsrA Plasmid	0.03421	1.343	100.7
Randomized DsrA Plasmid	0.03134	1.093	60.9
Randomized DsrA Plasmid	0.03254	1.079	61
Randomized DsrA Plasmid	0.03261	1.108	60.7
Randomized DsrA Plasmid	0.03142	1.098	57.6
Randomized DsrA Plasmid	0.03033	1.107	50.9
Randomized DsrA Plasmid	0.01845	1.145	60.3
Randomized DsrA Plasmid	0.02644	1.003	62.9
Randomized DsrA Plasmid	0.02699	1.06	60.4
Randomized DsrA Plasmid	0.0314	1.102	63.8
Randomized DsrA Plasmid	0.02529	1.15	51.5
Randomized DsrA Plasmid	0.01606	0.841	61.5
Randomized DsrA Plasmid	0.01192	1.217	70.4
Randomized DsrA Plasmid	0.02692	1.275	71
Randomized DsrA Plasmid	0.03047	1.18	62.7
Randomized DsrA Plasmid	0.02736	1.159	62.5
Randomized DsrA Plasmid	0.02923	1.114	61.3
Randomized DsrA Plasmid	0.02757	1.213	73.8
Randomized DsrA Plasmid	0.03091	1.103	63.9
Randomized DsrA Plasmid	0.01653	1.04	63.8
Randomized DsrA Plasmid	0.02243	0.966	80.9
Randomized DsrA Plasmid	0.03051	1.142	80.9
Randomized DsrA Plasmid	0.02117	0.909	61.8
Randomized DsrA Plasmid	0.03161	1.133	71.5
Randomized DsrA Plasmid	0.03006	1.122	81.7
Randomized DsrA Plasmid	0.0344	1.301	57.4
Randomized DsrA Plasmid	0.03107	1.267	56.1
Randomized DsrA Plasmid	0.02559	1.013	55.5
Randomized DsrA Plasmid	0.02736	1.03	56.2
Randomized DsrA Plasmid	0.02856	1.037	61
Randomized DsrA Plasmid	0.02767	1.046	85.3
Randomized DsrA Plasmid	0.02231	0.972	97.7
Randomized DsrA Plasmid	0.01932	0.917	56.8
Randomized DsrA Plasmid	0.01752	1.158	76.4
Randomized DsrA Plasmid	0.02883	1.018	67.3
Randomized DsrA Plasmid	0.01688	1.063	57.1
Randomized DsrA Plasmid	0.01512	0.999	99.7
Randomized DsrA Plasmid	0.02898	1.13	76
Randomized DsrA Plasmid	0.0321	1.123	86.5
Randomized DsrA Plasmid	0.02896	1.187	76.6
Randomized DsrA Plasmid	0.03304	1.16	57.5
Randomized DsrA Plasmid	0.02876	1.195	78.3
Randomized DsrA Plasmid	0.03076	1.182	55.3
Randomized DsrA Plasmid	0.03009	1.119	56
Randomized DsrA Plasmid	0.03076	1.052	67.6
Randomized DsrA Plasmid	0.03165	1.204	75
Randomized DsrA Plasmid	0.03309	1.249	56.5
Randomized DsrA Plasmid	0.01837	1.228	74.9
Randomized DsrA Plasmid	0.02861	1.253	69.9
Randomized DsrA Plasmid	0.03387	1.158	95.7
Randomized DsrA Plasmid	0.0309	1.2	61.6
Randomized DsrA Plasmid	0.03247	1.162	92.2
Randomized DsrA Plasmid	0.03259	1.154	84.4
Randomized DsrA Plasmid	0.03109	1.079	86.1
Randomized DsrA Plasmid	0.03196	1.159	76.1
Randomized DsrA Plasmid	0.02829	1.041	65.5
Randomized DsrA Plasmid	0.03017	1.071	72.7
Randomized DsrA Plasmid	0.01825	1.071	57.4
Randomized DsrA Plasmid	0.03022	1.049	61.3
Randomized DsrA Plasmid	0.03167	1.142	63.3
Randomized DsrA Plasmid	0.02769	1.143	56
Randomized DsrA Plasmid	0.02939	1.089	53.9
Randomized DsrA Plasmid	0.03125	1.046	61.8
Randomized DsrA Plasmid	0.02714	1.034	70.5
Randomized DsrA Plasmid	0.02991	1.178	61.8
Randomized DsrA Plasmid	0.02646	1.014	60.4
Randomized DsrA Plasmid	0.02849	1.112	95.1
Randomized DsrA Plasmid	0.02718	0.987	70.7
Randomized DsrA Plasmid	0.02923	1.011	91.1
Randomized DsrA Plasmid	0.02652	1.085	60.7
Randomized DsrA Plasmid	0.02702	1.072	60.7
Randomized DsrA Plasmid	0.02793	1.052	60.3
Randomized DsrA Plasmid	0.03168	1.107	62.9
Randomized DsrA Plasmid	0.03221	1.134	91.1
Randomized DsrA Plasmid	0.02984	1.11	74.4
Randomized DsrA Plasmid	0.03051	1.095	62.9
Randomized DsrA Plasmid	0.03245	1.135	70.4
Randomized DsrA Plasmid	0.03187	1.104	76.1
Randomized DsrA Plasmid	0.0309	1.082	90.8
Randomized DsrA Plasmid	0.02403	0.978	76.1
Randomized DsrA Plasmid	0.02615	1.05	60.7
Randomized DsrA Plasmid	0.03052	1.233	83.8
Randomized DsrA Plasmid	0.03055	1.222	90.6
Randomized DsrA Plasmid	0.01734	1.044	90.5
Randomized DsrA Plasmid	0.03181	1.098	90.4
Randomized DsrA Plasmid	0.02994	1.194	60.9
Randomized DsrA Plasmid	0.03206	1.152	70.6
Randomized DsrA Plasmid	0.02826	1.07	62.5
Randomized DsrA Plasmid	0.03084	1.105	60.4
Randomized DsrA Plasmid	0.0294	1.065	61.1
Randomized DsrA Plasmid	0.02953	1.133	93.1
Randomized DsrA Plasmid	0.02824	1.003	71.5
Randomized DsrA Plasmid	0.02421	0.971	70.6
Randomized DsrA Plasmid	0.03142	1.193	72.2
Randomized DsrA Plasmid	0.01265	0.811	62
Randomized DsrA Plasmid	0.0313	1.061	71.2
Randomized DsrA Plasmid	0.02985	1.081	62
Randomized DsrA Plasmid	0.02888	1.087	60.3
Randomized DsrA Plasmid	0.02956	1.092	80.8
Randomized DsrA Plasmid	0.02757	1.074	60.2
Randomized DsrA Plasmid	0.02873	1.086	71
Randomized DsrA Plasmid	0.02956	1.118	71.5
Randomized DsrA Plasmid	0.02714	1.102	81.4
Randomized DsrA Plasmid	0.03258	1.184	91.3
Randomized DsrA Plasmid	0.03249	1.153	71.8
Randomized DsrA Plasmid	0.03232	1.053	60.6
Randomized DsrA Plasmid	0.02889	1.137	82.1
Randomized DsrA Plasmid	0.02903	1.086	62.9
Randomized DsrA Plasmid	0.03237	1.166	66
Randomized DsrA Plasmid	0.02946	1.125	73.2
Randomized DsrA Plasmid	0.03009	1.162	63.2
Randomized DsrA Plasmid	0.02919	1.074	57.2
Randomized DsrA Plasmid	0.03053	1.14	60.5
Randomized DsrA Plasmid	0.03212	1.156	60.9
Randomized DsrA Plasmid	0.02723	1.188	75
Randomized DsrA Plasmid	0.03169	1.169	72.5
Randomized DsrA Plasmid	0.02758	1.122	62.2
Randomized DsrA Plasmid	0.02997	1.144	63.7
Randomized DsrA Plasmid	0.02595	1.163	60.6
Randomized DsrA Plasmid	0.02835	1.145	63.9
Randomized DsrA Plasmid	0.03003	1.146	60.8
Randomized DsrA Plasmid	0.02982	1.096	62
Randomized DsrA Plasmid	0.02835	1.11	64.3
Randomized DsrA Plasmid	0.0309	1.109	66
Randomized DsrA Plasmid	0.03117	1.154	50.5
Randomized DsrA Plasmid	0.0304	1.162	56.9
Randomized DsrA Plasmid	0.02701	1.08	76
Randomized DsrA Plasmid	0.02942	0.984	53.4
Randomized DsrA Plasmid	0.02934	1.103	51.2
Randomized DsrA Plasmid	0.02896	1.137	71
Randomized DsrA Plasmid	0.03031	1.148	91.6
Randomized DsrA Plasmid	0.02799	1.115	60.3
Randomized DsrA Plasmid	0.02985	1.087	73
Randomized DsrA Plasmid	0.03137	1.134	61.9
Randomized DsrA Plasmid	0.02858	1.098	64
Randomized DsrA Plasmid	0.03084	1.109	63
Randomized DsrA Plasmid	0.02878	1.1	61.2
Randomized DsrA Plasmid	0.0315	1.117	61.9
Randomized DsrA Plasmid	0.03096	1.127	61.7
Randomized DsrA Plasmid	0.03074	1.166	61
Randomized DsrA Plasmid	0.03047	1.116	81.7
Randomized DsrA Plasmid	0.02429	0.991	62.2
Randomized DsrA Plasmid	0.02973	1.137	66.1
Randomized DsrA Plasmid	0.01931	1.091	65.8
Randomized DsrA Plasmid	0.02565	1.043	61.9
Randomized DsrA Plasmid	0.02171	0.944	60.7
Randomized DsrA Plasmid	0.01979	0.919	61.6
Randomized DsrA Plasmid	0.02054	0.951	70.9
Randomized DsrA Plasmid	0.02579	1.028	71.9
Randomized DsrA Plasmid	0.02559	1.028	52.3
Randomized DsrA Plasmid	0.03077	1.101	51.2
Randomized DsrA Plasmid	0.02997	1.114	50.7
Randomized DsrA Plasmid	0.03081	1.093	53
Randomized DsrA Plasmid	0.03051	1.096	53
Randomized DsrA Plasmid	0.02971	1.1	52.3
Randomized DsrA Plasmid	0.02643	1.014	84.9
Randomized DsrA Plasmid	0.02909	1.088	62.2
Randomized DsrA Plasmid	0.0285	1.074	63.6
Randomized DsrA Plasmid	0.02939	1.083	71.8
Randomized DsrA Plasmid	0.02948	1.08	60.9
Randomized DsrA Plasmid	0.02333	1.058	62.2
Randomized DsrA Plasmid	0.02985	1.121	61.5
Randomized DsrA Plasmid	0.02743	1.092	60.9
Randomized DsrA Plasmid	0.02488	1.083	54.6
Randomized DsrA Plasmid	0.02644	1.076	80.5
Randomized DsrA Plasmid	0.01117	0.803	62
Randomized DsrA Plasmid	0.03075	1.073	73.2
Randomized DsrA Plasmid	0.02427	0.929	64.6
Randomized DsrA Plasmid	0.02837	1.087	65.5
Randomized DsrA Plasmid	0.02787	0.92	61.9
Randomized DsrA Plasmid	0.02678	1.098	60.8
Randomized DsrA Plasmid	0.02639	1.102	61.2
Randomized DsrA Plasmid	0.02806	1.049	71.4
Randomized DsrA Plasmid	0.02843	1.08	64.1
Randomized DsrA Plasmid	0.02764	1.064	61.2
Randomized DsrA Plasmid	0.02735	1.083	60.4
Randomized DsrA Plasmid	0.02768	1.094	81.4
Randomized DsrA Plasmid	0.03017	1.133	85.9
Randomized DsrA Plasmid	0.02948	0.976	63.7
Randomized DsrA Plasmid	0.01701	1.092	70.5
Randomized DsrA Plasmid	0.02999	1.1	76
Randomized DsrA Plasmid	0.02795	1.083	60.3
Randomized DsrA Plasmid	0.02949	1.107	60.8
Randomized DsrA Plasmid	0.02641	1.032	72
Randomized DsrA Plasmid	0.02878	1.081	63.2
Randomized DsrA Plasmid	0.03219	1.134	74.9
Randomized DsrA Plasmid	0.02859	1.059	71.2
Randomized DsrA Plasmid	0.03495	1.03	61.6
Randomized DsrA Plasmid	0.02642	1.471	62.3
Randomized DsrA Plasmid	0.02882	1.013	75.6
Randomized DsrA Plasmid	0.02559	1.018	75.8
Randomized DsrA Plasmid	0.02488	1.039	73.3
Randomized DsrA Plasmid	0.02192	0.974	51.8
Randomized DsrA Plasmid	0.02696	1.009	52.4
Randomized DsrA Plasmid	0.02615	0.985	54.3
Randomized DsrA Plasmid	0.02093	1.005	54.5
Randomized DsrA Plasmid	0.03142	1.12	50.5
Randomized DsrA Plasmid	0.02588	1.024	64
Randomized DsrA Plasmid	0.02821	1.033	54.8
Randomized DsrA Plasmid	0.02652	1.071	65.3
Randomized DsrA Plasmid	0.02749	1.039	60.8
Randomized DsrA Plasmid	0.02004	0.945	60.3
Randomized DsrA Plasmid	0.02696	0.988	54.3
Randomized DsrA Plasmid	0.02474	1.006	75
Randomized DsrA Plasmid	0.02378	0.963	75.7
Randomized DsrA Plasmid	0.02559	1.007	60.1
Randomized DsrA Plasmid	0.02335	0.984	63.8
Randomized DsrA Plasmid	0.02758	1.021	60.4
Randomized DsrA Plasmid	0.02795	1.057	60.7
Randomized DsrA Plasmid	0.02453	0.972	61.3
Randomized DsrA Plasmid	0.02636	1.037	64.1
Randomized DsrA Plasmid	0.02904	1.085	61.7
Randomized DsrA Plasmid	0.02516	1.025	91.3
Randomized DsrA Plasmid	0.02595	1.026	71.3
Randomized DsrA Plasmid	0.02735	1.066	75.9
Randomized DsrA Plasmid	0.02699	1.055	61.5
Randomized DsrA Plasmid	0.0225	0.992	72.4
Randomized DsrA Plasmid	0.02675	1.028	62.3
Randomized DsrA Plasmid	0.02474	1.054	71.3
Randomized DsrA Plasmid	0.02795	1.038	66.1
Randomized DsrA Plasmid	0.02516	1.047	75.9
Randomized DsrA Plasmid	0.01435	0.872	60.7
Randomized DsrA Plasmid	0.02468	1.03	72.9
Randomized DsrA Plasmid	0.02749	1.051	63.3
Randomized DsrA Plasmid	0.02672	1.022	71.2
Randomized DsrA Plasmid	0.024	1.049	76
Randomized DsrA Plasmid	0.02649	0.998	75.7
Randomized DsrA Plasmid	0.023	0.999	56.4
Randomized DsrA Plasmid	0.01569	1.019	60.3
Randomized DsrA Plasmid	0.02878	1.05	76
Randomized DsrA Plasmid	0.02843	1.05	75.8
Randomized DsrA Plasmid	0.02444	1.017	60.2
Randomized DsrA Plasmid	0.02703	1.053	51.2
Randomized DsrA Plasmid	0.02899	1.028	52.8
Randomized DsrA Plasmid	0.02415	0.99	60.4
Randomized DsrA Plasmid	0.0253	1.056	75.7
Randomized DsrA Plasmid	0.02639	1.024	60.5
Randomized DsrA Plasmid	0.024	1.033	50.3
Randomized DsrA Plasmid	0.02608	1.01	62.9
Randomized DsrA Plasmid	0.02488	1.018	61.2
Randomized DsrA Plasmid	0.02525	0.973	64
Randomized DsrA Plasmid	0.02432	1.007	62
Randomized DsrA Plasmid	0.02751	1.02	60.8
Randomized DsrA Plasmid	0.02699	1.01	60.4
Randomized DsrA Plasmid	0.02893	1.079	66.3
Randomized DsrA Plasmid	0.01932	0.834	61.1
Randomized DsrA Plasmid	0.0298	1.067	60.3
Randomized DsrA Plasmid	0.02606	1.005	68
Randomized DsrA Plasmid	0.02694	0.966	62.5
Randomized DsrA Plasmid	0.02641	1.07	60.3
Randomized DsrA Plasmid	0.02514	1.03	62.8
Randomized DsrA Plasmid	0.02415	1.023	52.8
Randomized DsrA Plasmid	0.02444	0.999	51.5
Randomized DsrA Plasmid	0.02511	0.977	53.6
Randomized DsrA Plasmid	0.02548	1.012	57.6
Randomized DsrA Plasmid	0.02266	1.005	50.6
Randomized DsrA Plasmid	0.02465	0.973	61.5
Randomized DsrA Plasmid	0.02711	1.023	50.4
Randomized DsrA Plasmid	0.0254	1.024	61.3
Randomized DsrA Plasmid	0.02655	1.011	60.8
Randomized DsrA Plasmid	0.02144	0.945	71.9
Randomized DsrA Plasmid	0.02725	1.048	66.1
Randomized DsrA Plasmid	0.02782	1.022	65.1
Randomized DsrA Plasmid	0.02368	0.997	62.9
Randomized DsrA Plasmid	0.0242	0.963	63.1
Randomized DsrA Plasmid	0.02154	0.959	52.1
Randomized DsrA Plasmid	0.0131	0.962	61.1
Randomized DsrA Plasmid	0.02391	0.945	61.1
Randomized DsrA Plasmid	0.0246	0.978	60.8
Randomized DsrA Plasmid	0.02672	0.982	66.3
Randomized DsrA Plasmid	0.02381	0.985	63.2
Randomized DsrA Plasmid	0.0259	0.996	62.8
Randomized DsrA Plasmid	0.02394	0.966	61
Randomized DsrA Plasmid	0.02525	0.953	56.1
Randomized DsrA Plasmid	0.02534	0.918	62.9
Randomized DsrA Plasmid	0.02886	1.033	53.6
Randomized DsrA Plasmid	0.0248	1.005	60.7
Randomized DsrA Plasmid	0.02636	1.011	60.5
Randomized DsrA Plasmid	0.023	0.962	60.3
Randomized DsrA Plasmid	0.02795	1.019	67.9
Randomized DsrA Plasmid	0.02687	1.023	60.5
Randomized DsrA Plasmid	0.02817	1.02	64
Randomized DsrA Plasmid	0.02845	1.035	70.2
Randomized DsrA Plasmid	0.02915	1.129	60.9
Randomized DsrA Plasmid	0.02011	1.427	64
Randomized DsrA Plasmid	0.03092	1.063	53.5
Randomized DsrA Plasmid	0.03555	1.333	63.6
Randomized DsrA Plasmid	0.02973	1.29	52.4
Randomized DsrA Plasmid	0.02845	1.444	80.3
Randomized DsrA Plasmid	0.02468	0.961	74
Randomized DsrA Plasmid	0.024	1.214	62.1
Randomized DsrA Plasmid	0.01389	0.824	91.5
Randomized DsrA Plasmid	0.02615	1.011	85.3
Randomized DsrA Plasmid	0.02398	0.943	92.3
Randomized DsrA Plasmid	0.0254	0.958	70.8
Randomized DsrA Plasmid	0.0326	1.113	96
Randomized DsrA Plasmid	0.01998	0.961	81.1
Randomized DsrA Plasmid	0.02666	0.892	72.2
Randomized DsrA Plasmid	0.02747	1.252	70.8
Randomized DsrA Plasmid	0.02607	1.126	61
Randomized DsrA Plasmid	0.03912	1.407	71.5
Randomized DsrA Plasmid	0.01702	1.09	96.5
Randomized DsrA Plasmid	0.02492	1.002	93.3
Randomized DsrA Plasmid	0.02588	1.015	93.1
Randomized DsrA Plasmid	0.0337	1.23	90.9
Randomized DsrA Plasmid	0.03291	1.31	64.8
Randomized DsrA Plasmid	0.02617	1.087	86.2
Randomized DsrA Plasmid	0.02721	1.073	57.2
Randomized DsrA Plasmid	0.02838	1.031	82.3
Randomized DsrA Plasmid	0.02511	1.049	93.4
Randomized DsrA Plasmid	0.02667	1.165	84.8
Randomized DsrA Plasmid	0.03185	1.143	71.6
Randomized DsrA Plasmid	0.03164	1.126	91.4
Randomized DsrA Plasmid	0.02302	1.081	90.8
Randomized DsrA Plasmid	0.02664	1.076	51.3
Randomized DsrA Plasmid	0.02793	1.028	56
Randomized DsrA Plasmid	0.01984	1.11	96.1
Randomized DsrA Plasmid	0.02272	0.937	52.2
Randomized DsrA Plasmid	0.02545	0.991	72.9
Randomized DsrA Plasmid	0.00526	0.807	71.3
Randomized DsrA Plasmid	0.01937	0.908	71.7
Randomized DsrA Plasmid	0.02185	1.183	73.1
Randomized DsrA Plasmid	0.03315	1.186	76.8
Randomized DsrA Plasmid	0.037	1.252	92
Randomized DsrA Plasmid	0.0287	1.216	60.8
Randomized DsrA Plasmid	0.02474	1.175	76.33
Randomized DsrA Plasmid	0.02058	1.029	50.6
Randomized DsrA Plasmid	0.0259	1.208	78.4
Randomized DsrA Plasmid	0.02802	1.191	94.5
Randomized DsrA Plasmid	0.02368	1.04	53.5
Randomized DsrA Plasmid	0.02117	1.12	71.3
Randomized DsrA Plasmid	0.01891	1.136	72
Randomized DsrA Plasmid	0.02214	1.126	70.5
Randomized DsrA Plasmid	0.02711	1.063	52.6
Randomized DsrA Plasmid	0.02961	1.054	96.5
Randomized DsrA Plasmid	0.02835	1.174	51
Randomized DsrA Plasmid	0.02363	1.376	52.9
Randomized DsrA Plasmid	0.02824	1.272	101.9
Randomized DsrA Plasmid	0.03046	1.213	101.6
Randomized DsrA Plasmid	0.03742	1.381	90.9
Randomized DsrA Plasmid	0.03345	1.19	74.9
Randomized DsrA Plasmid	0.01884	0.899	84.8
Randomized DsrA Plasmid	0.02754	1.142	51.8
Randomized DsrA Plasmid	0.02927	1.107	64
Randomized DsrA Plasmid	0.03151	1.175	71.8
Randomized DsrA Plasmid	0.02996	1.255	89.9
Randomized DsrA Plasmid	0.02817	1.27	82.6
Randomized DsrA Plasmid	0.03395	1.482	92.1
Randomized DsrA Plasmid	0.02246	1.099	92.8
Randomized DsrA Plasmid	0.03036	1.234	91.2
Randomized DsrA Plasmid	0.01765	1.275	51.2
Randomized DsrA Plasmid	0.01807	1.023	82.7
Randomized DsrA Plasmid	0.02251	1.208	91.1
Randomized DsrA Plasmid	0.0178	1.142	90.7
Randomized DsrA Plasmid	0.01659	0.878	81.2
Randomized DsrA Plasmid	0.0207	0.971	92.9
Randomized DsrA Plasmid	0.014	0.873	91.5
Randomized DsrA Plasmid	0.01963	0.965	82.9
Randomized DsrA Plasmid	0.02516	1.1	65.9
Randomized DsrA Plasmid	0.0303	1.176	51.5
Randomized DsrA Plasmid	0.02038	1.294	67
Randomized DsrA Plasmid	0.02183	1.286	66.2
Randomized DsrA Plasmid	0.02873	1.267	62.9
Randomized DsrA Plasmid	0.03207	1.248	61.6
Randomized DsrA Plasmid	0.03509	1.231	50.8
Randomized DsrA Plasmid	0.00542	0.841	54.3
Randomized DsrA Plasmid	0.01482	0.827	91.5
Randomized DsrA Plasmid	0.03401	1.038	97.7
Randomized DsrA Plasmid	0.03167	1.062	81.6
Randomized DsrA Plasmid	0.01847	1.044	61.7
Randomized DsrA Plasmid	0.01884	1.028	74.3
Randomized DsrA Plasmid	0.0315	1.2	63.9
Randomized DsrA Plasmid	0.02423	1.326	53.4
Randomized DsrA Plasmid	0.03664	1.178	61.1
Randomized DsrA Plasmid	0.00785	0.895	60.1
Randomized DsrA Plasmid	0.02656	1.211	55.8
Randomized DsrA Plasmid	0.03104	1.28	62.5
Randomized DsrA Plasmid	0.01669	1.515	50.9
Randomized DsrA Plasmid	0.02879	1.053	52.5
Randomized DsrA Plasmid	0.03057	1.17	51.2
Randomized DsrA Plasmid	0.03164	1.153	57.4
Randomized DsrA Plasmid	0.028	1.176	50.1
Randomized DsrA Plasmid	0.03356	1.161	50.4
Randomized DsrA Plasmid	0.02233	0.922	51
Randomized DsrA Plasmid	0.02383	0.916	66.1
Randomized DsrA Plasmid	0.0263	0.997	51.9
Randomized DsrA Plasmid	0.02746	1.179	53.7
Randomized DsrA Plasmid	0.03423	1.205	50.3
Randomized DsrA Plasmid	0.03205	1.226	60.5
Randomized DsrA Plasmid	0.0286	1.202	57.5
Randomized DsrA Plasmid	0.01846	1.2	70.7
Randomized DsrA Plasmid	0.02934	1.184	70.3
Randomized DsrA Plasmid	0.01899	1.23	50.4
Randomized DsrA Plasmid	0.03254	1.205	63.6
Randomized DsrA Plasmid	0.02944	1.196	70.9
Randomized DsrA Plasmid	0.02758	0.97	51.7
Randomized DsrA Plasmid	0.0319	1.208	71.4
Randomized DsrA Plasmid	0.0277	0.971	70.6
Randomized DsrA Plasmid	0.03104	1.2	70.5
Randomized DsrA Plasmid	0.033	1.21	52.1
Randomized DsrA Plasmid	0.03328	1.223	55.2
Randomized DsrA Plasmid	0.02963	1.148	74.1
Randomized DsrA Plasmid	0.01946	1.225	62.4
Randomized DsrA Plasmid	0.03255	1.19	60.4
Randomized DsrA Plasmid	0.02917	1.181	52.9
Randomized DsrA Plasmid	0.03178	1.206	51.7
Randomized DsrA Plasmid	0.03332	1.197	56
Randomized DsrA Plasmid	0.02932	1.103	58
Randomized DsrA Plasmid	0.03	1.213	61.7
Randomized DsrA Plasmid	0.02856	1.058	70.1
Randomized DsrA Plasmid	0.02858	1.194	56
Randomized DsrA Plasmid	0.03245	1.128	50.7
Randomized DsrA Plasmid	0.03289	1.23	52.3
Randomized DsrA Plasmid	0.02965	1.145	51.9
Randomized DsrA Plasmid	0.02654	1.199	60.5
Randomized DsrA Plasmid	0.02054	0.927	72.2
Randomized DsrA Plasmid	0.0327	1.147	56
Randomized DsrA Plasmid	0.03228	1.24	51.6
Randomized DsrA Plasmid	0.03282	1.217	64.5
Randomized DsrA Plasmid	0.03216	1.244	50.8
Randomized DsrA Plasmid	0.01971	1.21	56.4
Randomized DsrA Plasmid	0.03424	1.122	57.7
Randomized DsrA Plasmid	0.03102	1.218	65.4
Randomized DsrA Plasmid	0.01588	0.837	51.3
Randomized DsrA Plasmid	0.0208	1.211	55.9
Randomized DsrA Plasmid	0.01929	0.899	70.2
Randomized DsrA Plasmid	0.03052	1.261	73.2
Randomized DsrA Plasmid	0.03115	1.247	60.9
Randomized DsrA Plasmid	0.03046	1.214	52.8
Randomized DsrA Plasmid	0.03053	1.225	53
Randomized DsrA Plasmid	0.03122	1.191	71.1
Randomized DsrA Plasmid	0.02976	1.082	76.4
Randomized DsrA Plasmid	0.0355	1.186	77.7
Randomized DsrA Plasmid	0.03358	1.214	51.3
Randomized DsrA Plasmid	0.03106	1.223	62.4
Randomized DsrA Plasmid	0.02654	1.002	61.9
Randomized DsrA Plasmid	0.0248	0.913	63.9
Randomized DsrA Plasmid	0.02895	1.141	64.7
Randomized DsrA Plasmid	0.03418	1.214	71.3
Randomized DsrA Plasmid	0.03205	1.177	70.5
Randomized DsrA Plasmid	0.03136	1.228	73.7
Randomized DsrA Plasmid	0.03041	1.159	70.5
Randomized DsrA Plasmid	0.02668	1.129	64.3
Randomized DsrA Plasmid	0.02924	1.15	60.8
Randomized DsrA Plasmid	0.0324	1.146	60.6
Randomized DsrA Plasmid	0.02443	0.937	67.8
Randomized DsrA Plasmid	0.03264	1.194	61
Randomized DsrA Plasmid	0.03059	1.006	52.9
Randomized DsrA Plasmid	0.02775	1.121	81.8
Randomized DsrA Plasmid	0.03278	1.196	71.9
Randomized DsrA Plasmid	0.02915	1.189	71.4
Randomized DsrA Plasmid	0.0279	1.14	62.3
Randomized DsrA Plasmid	0.03321	1.171	73.4
Randomized DsrA Plasmid	0.02926	1.183	61.9
Randomized DsrA Plasmid	0.03093	1.189	50.7
Randomized DsrA Plasmid	0.02498	1.189	63.8
Randomized DsrA Plasmid	0.02714	1.155	74.9
Randomized DsrA Plasmid	0.03193	1.129	71.4
Randomized DsrA Plasmid	0.02594	1.015	70.9
Randomized DsrA Plasmid	0.02997	1.189	65.3
Randomized DsrA Plasmid	0.03318	1.039	51.5
Randomized DsrA Plasmid	0.02465	0.8	50.6
Randomized DsrA Plasmid	0.03694	1.131	60.3
Randomized DsrA Plasmid	0.03518	1.178	55
Randomized DsrA Plasmid	0.03408	1.17	54.2
Randomized DsrA Plasmid	0.03029	1.102	58.6
Randomized DsrA Plasmid	0.02643	0.977	51
Randomized DsrA Plasmid	0.03143	1.088	51.1
Randomized DsrA Plasmid	0.02347	0.892	61.8
Randomized DsrA Plasmid	0.03401	1.213	63.2
Randomized DsrA Plasmid	0.02889	1.193	51.5
Randomized DsrA Plasmid	0.02651	0.896	51
Randomized DsrA Plasmid	0.03965	1.42	74.5
Randomized DsrA Plasmid	0.03123	1.037	60.2
Randomized DsrA Plasmid	0.02991	1.124	70.4
Randomized DsrA Plasmid	0.03029	1.041	73.3
Randomized DsrA Plasmid	0.03073	1.044	70.6
Randomized DsrA Plasmid	0.0312	1.127	73.4
Randomized DsrA Plasmid	0.02875	1.073	77.5
Randomized DsrA Plasmid	0.02175	0.933	71.48
Randomized DsrA Plasmid	0.02989	1.05	74.53
Randomized DsrA Plasmid	0.02473	1.09	62
Randomized DsrA Plasmid	0.0285	1.12	63.2
Randomized DsrA Plasmid	0.02691	1.038	52.4
Randomized DsrA Plasmid	0.03202	1.146	70.9
Randomized DsrA Plasmid	0.03183	1.081	75.6
Randomized DsrA Plasmid	0.03394	1.246	70.4
Randomized DsrA Plasmid	0.03015	1.186	52.5
Randomized DsrA Plasmid	0.02891	1.13	63.4
Randomized DsrA Plasmid	0.03096	1.145	60.6
Randomized DsrA Plasmid	0.03127	1.212	52.3
Randomized DsrA Plasmid	0.03439	1.214	63.5
Randomized DsrA Plasmid	0.0313	1.288	51
Randomized DsrA Plasmid	0.03096	1.255	60.9
Randomized DsrA Plasmid	0.03178	1.183	64.1
Randomized DsrA Plasmid	0.01705	0.829	65.4
Randomized DsrA Plasmid	0.02208	0.855	65.7
Randomized DsrA Plasmid	0.03045	1.034	50.7
Randomized DsrA Plasmid	0.03071	1.146	51.3
Randomized DsrA Plasmid	0.0191	1.143	64.5
Randomized DsrA Plasmid	0.03154	1.14	60.4
Randomized DsrA Plasmid	0.02835	1.159	61.9
Randomized DsrA Plasmid	0.02632	0.936	60.5
Randomized DsrA Plasmid	0.01768	1.112	51.8
Randomized DsrA Plasmid	0.03064	1.127	51.1
Randomized DsrA Plasmid	0.02968	1.115	64.9
Randomized DsrA Plasmid	0.02797	1.081	91.9
Randomized DsrA Plasmid	0.02786	1.085	73.2
Randomized DsrA Plasmid	0.03228	1.129	72.2
Randomized DsrA Plasmid	0.03199	1.168	62.5
Randomized DsrA Plasmid	0.02824	0.879	61.7
Randomized DsrA Plasmid	0.02967	1.091	50.2
Randomized DsrA Plasmid	0.02736	1.134	51
Randomized DsrA Plasmid	0.03019	1.149	81.8
Randomized DsrA Plasmid	0.03038	1.126	93.9
Randomized DsrA Plasmid	0.03018	1.124	73
Randomized DsrA Plasmid	0.02932	1.138	91.6
Randomized DsrA Plasmid	0.02347	0.889	61.2
Randomized DsrA Plasmid	0.02622	0.893	72.6
Randomized DsrA Plasmid	0.02595	1.076	51.9
Randomized DsrA Plasmid	0.03067	1.13	51
Randomized DsrA Plasmid	0.02976	1.136	66
Randomized DsrA Plasmid	0.02769	1.117	72.1
Randomized DsrA Plasmid	0.03029	1.115	50.8
Randomized DsrA Plasmid	0.02959	1.072	97.3
Randomized DsrA Plasmid	0.02736	1.094	80.7
Randomized DsrA Plasmid	0.02985	1.108	65.6
Randomized DsrA Plasmid	0.02867	1.069	92.8
Randomized DsrA Plasmid	0.02767	1.015	111.6
Randomized DsrA Plasmid	0.02821	1.082	90.9
Randomized DsrA Plasmid	0.0306	1.133	60.9
Randomized DsrA Plasmid	0.02733	1.064	52.5
Randomized DsrA Plasmid	0.03144	1.145	91.4
Randomized DsrA Plasmid	0.03138	1.122	70.3
Randomized DsrA Plasmid	0.028	1.113	50.1
Randomized DsrA Plasmid	0.0279	1.089	70.6
Randomized DsrA Plasmid	0.01718	1.094	84.7
Randomized DsrA Plasmid	0.02725	1.098	90.2
Randomized DsrA Plasmid	0.0283	1.07	82.3
Randomized DsrA Plasmid	0.02632	1.033	71.1
Randomized DsrA Plasmid	0.0302	1.077	102.5
Randomized DsrA Plasmid	0.03058	1.066	64.5
Randomized DsrA Plasmid	0.02238	0.875	67.3
Randomized DsrA Plasmid	0.0287	1.042	91.7
Randomized DsrA Plasmid	0.03207	1.116	81.9
Randomized DsrA Plasmid	0.02652	1.103	91.7
Randomized DsrA Plasmid	0.02971	1.091	92.8
Randomized DsrA Plasmid	0.03024	1.119	100.2
Randomized DsrA Plasmid	0.02667	1.07	91.3
Randomized DsrA Plasmid	0.02944	1.013	101.9
Randomized DsrA Plasmid	0.02465	0.976	61.6
Randomized DsrA Plasmid	0.02806	1.094	51.4
Randomized DsrA Plasmid	0.02728	1.054	50.7
Randomized DsrA Plasmid	0.02754	1.151	103.5
Randomized DsrA Plasmid	0.02292	0.894	94.3
Randomized DsrA Plasmid	0.03146	1.067	83.3
Randomized DsrA Plasmid	0.02978	0.944	55
Randomized DsrA Plasmid	0.02993	0.986	70.9
Randomized DsrA Plasmid	0.02929	0.995	49.8
Randomized DsrA Plasmid	0.02786	1.069	52.9
Randomized DsrA Plasmid	0.02551	0.954	54
Randomized DsrA Plasmid	0.01443	0.849	53.6
Randomized DsrA Plasmid	0.0243	1.592	58
Randomized DsrA Plasmid	0.02711	1.015	66.2
Randomized DsrA Plasmid	0.03119	1.103	65.8
Randomized DsrA Plasmid	0.02944	1.043	65.7
Randomized DsrA Plasmid	0.02	1.155	63.4
Randomized DsrA Plasmid	0.03071	1.109	60.1
Randomized DsrA Plasmid	0.02795	1.021	55.3
Randomized DsrA Plasmid	0.02886	1.056	54.9
Randomized DsrA Plasmid	0.02664	1.033	64
Randomized DsrA Plasmid	0.02315	1.002	53
Randomized DsrA Plasmid	0.02253	0.88	76.1
Randomized DsrA Plasmid	0.01998	0.831	75.8
Randomized DsrA Plasmid	0.02835	1.041	76
Randomized DsrA Plasmid	0.01705	0.964	75.8
Randomized DsrA Plasmid	0.02582	1.053	60.4
Randomized DsrA Plasmid	0.01354	0.819	64.6
Randomized DsrA Plasmid	0.02689	1.056	53.9
Randomized DsrA Plasmid	0.02488	1.038	66.2
Randomized DsrA Plasmid	0.02488	1.026	61.9
Randomized DsrA Plasmid	0.02953	1.083	50
Randomized DsrA Plasmid	0.02286	0.999	63.3
Randomized DsrA Plasmid	0.02133	0.869	55
Randomized DsrA Plasmid	0.02537	0.987	63
Randomized DsrA Plasmid	0.02476	0.969	51.2
Randomized DsrA Plasmid	0.0162	1.059	75
Randomized DsrA Plasmid	0.02604	0.984	60
Randomized DsrA Plasmid	0.02136	0.978	73.6
Randomized DsrA Plasmid	0.02734	1.008	62.5
Randomized DsrA Plasmid	0.02318	0.963	65.2
Randomized DsrA Plasmid	0.02618	1.002	64.6
Randomized DsrA Plasmid	0.01914	0.936	71.5
Randomized DsrA Plasmid	0.02177	0.96	60.4
Randomized DsrA Plasmid	0.02662	1.026	65.2
Randomized DsrA Plasmid	0.01688	0.902	77.6
Randomized DsrA Plasmid	0.0169	0.948	65.5
Randomized DsrA Plasmid	0.02584	0.958	55.1
Randomized DsrA Plasmid	0.02525	1.003	66.8
Randomized DsrA Plasmid	0.03058	1.121	64
Randomized DsrA Plasmid	0.02767	1.081	61
Randomized DsrA Plasmid	0.02612	1.007	57
Randomized DsrA Plasmid	0.02443	1.007	75.2
Randomized DsrA Plasmid	0.01762	0.911	65.8
Randomized DsrA Plasmid	0.02111	0.954	61.7
Randomized DsrA Plasmid	0.03072	1.1	51.8
Randomized DsrA Plasmid	0.02516	1.067	65
Randomized DsrA Plasmid	0.02828	1.071	48.9
Randomized DsrA Plasmid	0.02718	1.067	67.7
Randomized DsrA Plasmid	0.0258	0.959	61.1
Randomized DsrA Plasmid	0.02809	1.055	63.8
Randomized DsrA Plasmid	0.02628	1.032	61.3
Randomized DsrA Plasmid	0.02353	1.008	71.2
Randomized DsrA Plasmid	0.02606	1.063	70.7
Randomized DsrA Plasmid	0.02666	1.039	61.6
Randomized DsrA Plasmid	0.02921	1.021	70.4
Randomized DsrA Plasmid	0.02767	1.045	66.5
Randomized DsrA Plasmid	0.02554	1.037	72.8
Randomized DsrA Plasmid	0.02758	1.035	60.2
Randomized DsrA Plasmid	0.02548	1.007	61.9
Randomized DsrA Plasmid	0.02755	1.01	71
Randomized DsrA Plasmid	0.02008	0.948	90.5
Randomized DsrA Plasmid	0.02332	0.951	66.9
Randomized DsrA Plasmid	0.02471	1.008	74.5
Randomized DsrA Plasmid	0.0287	1.033	60.7
Randomized DsrA Plasmid	0.02893	1.068	74.8
Randomized DsrA Plasmid	0.02649	1.057	86
Randomized DsrA Plasmid	0.02882	1.019	95.2
Randomized DsrA Plasmid	0.02554	1.014	49.9
Randomized DsrA Plasmid	0.02565	1.028	62.8
Randomized DsrA Plasmid	0.0248	0.994	58
Randomized DsrA Plasmid	0.01444	0.881	65
Randomized DsrA Plasmid	0.02565	1.002	82.9
Randomized DsrA Plasmid	0.02637	1.012	70.5
Randomized DsrA Plasmid	0.02875	1.102	53.6
Randomized DsrA Plasmid	0.03011	1.075	90.7
Randomized DsrA Plasmid	0.02958	0.996	64.6
Randomized DsrA Plasmid	0.02601	1.046	60.3
Randomized DsrA Plasmid	0.01998	0.93	64.3
Randomized DsrA Plasmid	0.0263	1.018	60.2
Randomized DsrA Plasmid	0.0236	0.993	60
Randomized DsrA Plasmid	0.03046	1.409	83.9
Randomized DsrA Plasmid	0.033	1.111	55.1
Randomized DsrA Plasmid	0.02617	1.062	61.3
Randomized DsrA Plasmid	0.01666	1.121	57.7
Randomized DsrA Plasmid	0.02383	0.998	76
Randomized DsrA Plasmid	0.02898	1.125	80
Randomized DsrA Plasmid	0.01058	0.889	63.4
Randomized DsrA Plasmid	0.02978	1.06	75.7
Randomized DsrA Plasmid	0.02778	1.131	72.5
Randomized DsrA Plasmid	0.02515	1.011	71.9
Randomized DsrA Plasmid	0.01738	0.915	59.9
Randomized DsrA Plasmid	0.01984	0.988	63.5
Randomized DsrA Plasmid	0.02353	1.058	59.6
Randomized DsrA Plasmid	0.01986	0.899	61.4
Randomized DsrA Plasmid	0.03067	1.014	67.2
Randomized DsrA Plasmid	0.01937	0.864	65
Randomized DsrA Plasmid	0.03129	1.166	60.8
Randomized DsrA Plasmid	0.02353	1.068	52.6
Randomized DsrA Plasmid	0.02424	0.916	71.2
Randomized DsrA Plasmid	0.02228	0.872	73.9
Randomized DsrA Plasmid	0.02779	1.173	63.5
Randomized DsrA Plasmid	0.02581	1.057	54.1
Randomized DsrA Plasmid	0.03058	1.048	57.3
Randomized DsrA Plasmid	0.01932	0.848	65.4
Randomized DsrA Plasmid	0.02282	0.898	52.8
Randomized DsrA Plasmid	0.01958	0.844	48
Randomized DsrA Plasmid	0.02876	1.049	63.1
Randomized DsrA Plasmid	0.02835	1.079	63
Randomized DsrA Plasmid	0.01855	0.877	61.5
Randomized DsrA Plasmid	0.02208	0.948	62.2
Randomized DsrA Plasmid	0.01593	0.855	59.9
Randomized DsrA Plasmid	0.02332	0.973	70.8
Randomized DsrA Plasmid	0.03004	1.026	51.1
Randomized DsrA Plasmid	0.03043	1.124	50.6
Randomized DsrA Plasmid	0.03114	1.232	70.7
Randomized DsrA Plasmid	0.02913	1.108	62.7
Randomized DsrA Plasmid	0.02951	1.051	63
Randomized DsrA Plasmid	0.02514	0.977	50.6
Randomized DsrA Plasmid	0.02944	1.017	73.2
Randomized DsrA Plasmid	0.02817	1.047	61.5
Randomized DsrA Plasmid	0.03267	1.11	71
Randomized DsrA Plasmid	0.02484	0.992	82.5
Randomized DsrA Plasmid	0.01342	0.985	53.9
Randomized DsrA Plasmid	0.02873	1.078	64.6
Randomized DsrA Plasmid	0.02928	1.079	64.3
Randomized DsrA Plasmid	0.02324	0.897	65.6
Randomized DsrA Plasmid	0.02565	1.008	63
Randomized DsrA Plasmid	0.02644	1.17	64.6
Randomized DsrA Plasmid	0.02733	1.041	58.1
Randomized DsrA Plasmid	0.02224	0.973	59.8
Randomized DsrA Plasmid	0.02691	1.012	73.5
Randomized DsrA Plasmid	0.03134	1.087	52.7
Randomized DsrA Plasmid	0.02492	0.938	60.6
Randomized DsrA Plasmid	0.02337	0.984	51.9
Randomized DsrA Plasmid	0.02678	1.084	52.3
Randomized DsrA Plasmid	0.01826	0.91	54.5
Randomized DsrA Plasmid	0.01086	0.801	50.5
Randomized DsrA Plasmid	0.01557	0.906	55.2
Randomized DsrA Plasmid	0.01776	0.84	54.7
Randomized DsrA Plasmid	0.02488	1.071	51.7
Randomized DsrA Plasmid	0.02318	0.877	51.2
Randomized DsrA Plasmid	0.02743	1.057	64.8
Randomized DsrA Plasmid	0.02342	1	61.9
Randomized DsrA Plasmid	0.02907	0.797	50.5
Randomized DsrA Plasmid	0.00846	0.814	60.5
Randomized DsrA Plasmid	0.02669	1.048	53.3
Randomized DsrA Plasmid	0.0236	0.967	53.7
Randomized DsrA Plasmid	0.00888	0.911	51.2
Randomized DsrA Plasmid	0.01778	0.824	59.8
Randomized DsrA Plasmid	0.02606	0.902	60.8
Randomized DsrA Plasmid	0.03485	1.5	65
Randomized DsrA Plasmid	0.03121	1.088	51
Randomized DsrA Plasmid	0.03263	1.199	62.2
Randomized DsrA Plasmid	0.03024	1.142	72.9
Randomized DsrA Plasmid	0.02935	1.151	60.5
Randomized DsrA Plasmid	0.02754	0.948	55.4
Randomized DsrA Plasmid	0.01685	1.05	66.3
Randomized DsrA Plasmid	0.00976	0.815	61.1
Randomized DsrA Plasmid	0.03079	1.119	64.1
Randomized DsrA Plasmid	0.03462	1.206	54.6
Randomized DsrA Plasmid	0.02106	0.846	66.2
Randomized DsrA Plasmid	0.02984	1.213	64.5
Randomized DsrA Plasmid	0.03408	1.266	63.43
Randomized DsrA Plasmid	0.02901	1.106	61.1
Randomized DsrA Plasmid	0.0383	1.309	51.2
Randomized DsrA Plasmid	0.03019	1.19	63.6
Randomized DsrA Plasmid	0.02733	1.019	55.1
Randomized DsrA Plasmid	0.0307	1.113	54.9
Randomized DsrA Plasmid	0.03297	1.197	56.2
Randomized DsrA Plasmid	0.03108	1.132	62.1
Randomized DsrA Plasmid	0.02639	1.081	51.7
Randomized DsrA Plasmid	0.02908	1.186	50.7
Randomized DsrA Plasmid	0.02893	1.164	60.8
Randomized DsrA Plasmid	0.02925	1.146	49.1
Randomized DsrA Plasmid	0.02522	1.011	56.9
Randomized DsrA Plasmid	0.02864	1.084	61.2
Randomized DsrA Plasmid	0.02639	1.031	61.9
Randomized DsrA Plasmid	0.02128	0.928	58.6
Randomized DsrA Plasmid	0.01265	0.95	53.8
Randomized DsrA Plasmid	0.03646	1.209	56.1
Randomized DsrA Plasmid	0.02106	0.897	60.3
Randomized DsrA Plasmid	0.01932	0.942	46.3
Randomized DsrA Plasmid	0.02144	1.06	61.3
Randomized DsrA Plasmid	0.02559	1.022	56.1
Randomized DsrA Plasmid	0.02136	0.964	51.5
Randomized DsrA Plasmid	0.01691	0.937	51.4
Randomized DsrA Plasmid	0.03691	1.22	51.7
Randomized DsrA Plasmid	0.01937	0.929	75.5
Randomized DsrA Plasmid	0.01944	0.87	55.9
Randomized DsrA Plasmid	0.01884	0.933	54.7
Randomized DsrA Plasmid	0.02318	0.955	53.4
Randomized DsrA Plasmid	0.03031	1.149	55.3
Randomized DsrA Plasmid	0.02499	1.115	56.4
Randomized DsrA Plasmid	0.02411	0.997	50.5
Randomized DsrA Plasmid	0.02188	0.985	52
Randomized DsrA Plasmid	0.02543	1.022	53
Randomized DsrA Plasmid	0.02665	1.116	55.1
Randomized DsrA Plasmid	0.01519	0.886	52.5
Randomized DsrA Plasmid	0.01884	0.923	75.3
Randomized DsrA Plasmid	0.01747	0.891	55.6
Randomized DsrA Plasmid	0.00838	0.9	52.3
Randomized DsrA Plasmid	0.02266	0.969	55.3
Randomized DsrA Plasmid	0.01566	0.853	57.2
Randomized DsrA Plasmid	0.02931	1.134	54.3
Randomized DsrA Plasmid	0.03489	1.2	54.7
Randomized DsrA Plasmid	0.0235	1.172	54
Randomized DsrA Plasmid	0.02031	1.007	50
Randomized DsrA Plasmid	0.02674	1.036	50.5
Randomized DsrA Plasmid	0.0315	1.29	51.7
Randomized DsrA Plasmid	0.02192	0.946	52.1
Randomized DsrA Plasmid	0.03387	1.275	91.1
Randomized DsrA Plasmid	0.02455	1.152	90.9
Randomized DsrA Plasmid	0.02427	1.003	102.7
Randomized DsrA Plasmid	0.03131	1.132	50.6
Randomized DsrA Plasmid	0.02961	1.243	48.1
Randomized DsrA Plasmid	0.02764	1.027	64.6
Randomized DsrA Plasmid	0.02652	1.075	54.2
Randomized DsrA Plasmid	0.02875	1.07	52.6
Randomized DsrA Plasmid	0.03125	1.161	61.8
Randomized DsrA Plasmid	0.02329	1.043	50.7
Randomized DsrA Plasmid	0.0309	1.132	54.4
Randomized DsrA Plasmid	0.02503	0.803	60.9
Randomized DsrA Plasmid	0.02303	1.012	50.4
Randomized DsrA Plasmid	0.02925	1.142	54.2
Randomized DsrA Plasmid	0.02515	1.051	54.4
Randomized DsrA Plasmid	0.02211	0.797	50.5
Randomized DsrA Plasmid	0.02723	1.106	52.6
Randomized DsrA Plasmid	0.02737	1.009	50.3
Randomized DsrA Plasmid	0.03033	1.174	50
Randomized DsrA Plasmid	0.03243	1.197	51.2
Randomized DsrA Plasmid	0.02632	1.167	60.9
Randomized DsrA Plasmid	0.0278	1.109	51.5
Randomized DsrA Plasmid	0.00435	0.803	61.7
Randomized DsrA Plasmid	0.03683	1.624	60.4
Randomized DsrA Plasmid	0.02773	1.012	51.4
Randomized DsrA Plasmid	0.02901	1.149	73.5
Randomized DsrA Plasmid	0.02929	1.151	61.9
Randomized DsrA Plasmid	0.02824	1.12	62.6
Randomized DsrA Plasmid	0.02779	1.097	61.7
Randomized DsrA Plasmid	0.0254	0.898	53.4
Randomized DsrA Plasmid	0.01602	1.062	62.1
Randomized DsrA Plasmid	0.0283	1.059	72.4
Randomized DsrA Plasmid	0.02076	0.948	65.3
Randomized DsrA Plasmid	0.00622	0.803	60.2
Randomized DsrA Plasmid	0.01972	0.908	64.3
Randomized DsrA Plasmid	0.02411	1.045	64.8
Randomized DsrA Plasmid	0.0306	1.107	61.5
Randomized DsrA Plasmid	0.02076	1.225	60.4
Randomized DsrA Plasmid	0.02756	1.073	52.4
Randomized DsrA Plasmid	0.03588	1.248	64.2
Randomized DsrA Plasmid	0.02654	1.071	51.6
Randomized DsrA Plasmid	0.03008	1.052	61.3
Randomized DsrA Plasmid	0.0306	1.1	50.7
Randomized DsrA Plasmid	0.02971	1.072	100.4
Randomized DsrA Plasmid	0.0189	1.11	100.9
Randomized DsrA Plasmid	0.03049	1.119	51.3
Randomized DsrA Plasmid	0.02208	0.875	50.5
Randomized DsrA Plasmid	0.02728	0.955	51
Randomized DsrA Plasmid	0.02878	1.075	106.4
Randomized DsrA Plasmid	0.0304	1.082	54.3
Randomized DsrA Plasmid	0.02777	1.04	52.4
Randomized DsrA Plasmid	0.0248	0.987	51.5
Randomized DsrA Plasmid	0.01775	1.046	49
Randomized DsrA Plasmid	0.02664	1.03	52.5
Randomized DsrA Plasmid	0.02834	0.799	53
Randomized DsrA Plasmid	0.02513	1.065	52.7
Randomized DsrA Plasmid	0.02474	1.058	51.2
Randomized DsrA Plasmid	0.00757	0.805	52.1
Randomized DsrA Plasmid	0.02659	0.965	55.5
Randomized DsrA Plasmid	0.02811	1.187	52.6
Randomized DsrA Plasmid	0.02556	0.98	52.9
Randomized DsrA Plasmid	0.02188	0.862	51
Randomized DsrA Plasmid	0.02666	1.159	75.2
Randomized DsrA Plasmid	0.02891	1.034	64.8
Randomized DsrA Plasmid	0.02247	0.96	49.9
Randomized DsrA Plasmid	0.00593	0.815	51.4
Randomized DsrA Plasmid	0.02743	1.023	51
Randomized DsrA Plasmid	0.02004	0.909	50
Randomized DsrA Plasmid	0.02784	1.108	55
Randomized DsrA Plasmid	0.02519	1.026	52.7
Randomized DsrA Plasmid	0.02286	0.982	50.6
Randomized DsrA Plasmid	0.02449	0.93	52.3
Randomized DsrA Plasmid	0.02318	0.933	57
Randomized DsrA Plasmid	0.01986	0.94	54.1
Randomized DsrA Plasmid	0.01984	0.938	50.7
Randomized DsrA Plasmid	0.01627	0.918	52.7
Randomized DsrA Plasmid	0.02231	1.001	61.3
Randomized DsrA Plasmid	0.02268	1.02	50.7
Randomized DsrA Plasmid	0.02133	0.904	51.5
Randomized DsrA Plasmid	0.02342	0.942	55.1
Randomized DsrA Plasmid	0.02228	0.95	75.1
Randomized DsrA Plasmid	0.02041	0.917	55.5
Randomized DsrA Plasmid	0.02659	0.99	60.2
Randomized DsrA Plasmid	0.02243	0.959	63.4
Randomized DsrA Plasmid	0.02436	0.935	64.1
Randomized DsrA Plasmid	0.02893	1.011	52.9
Randomized DsrA Plasmid	0.01972	0.899	65.6
Randomized DsrA Plasmid	0.0248	1.036	54.4
Randomized DsrA Plasmid	0.02567	1.06	75.5
Randomized DsrA Plasmid	0.02224	0.916	54.9
Randomized DsrA Plasmid	0.01129	0.973	50.1
Randomized DsrA Plasmid	0.0109	0.821	51.2
Randomized DsrA Plasmid	0.032	1.196	51.3
Randomized DsrA Plasmid	0.01937	0.859	50.7
Randomized DsrA Plasmid	0.02548	1.014	51.7
Randomized DsrA Plasmid	0.02565	1.079	50.7
Randomized DsrA Plasmid	0.02914	0.913	51.5
Randomized DsrA Plasmid	0.02542	0.909	52.3
Randomized DsrA Plasmid	0.03109	1.124	52.6
Randomized DsrA Plasmid	0.027	1.061	50.8
Randomized DsrA Plasmid	0.02845	1.007	51.5
Randomized DsrA Plasmid	0.03099	1.103	50.9
Randomized DsrA Plasmid	0.03293	1.371	49.9
Randomized DsrA Plasmid	0.03071	1.075	52.2
Randomized DsrA Plasmid	0.02574	0.885	50.1
Randomized DsrA Plasmid	0.03045	1.184	50.5
Randomized DsrA Plasmid	0.03125	1.13	46.7
Randomized DsrA Plasmid	0.02988	1.176	52.8
Randomized DsrA Plasmid	0.03177	1.169	63
Randomized DsrA Plasmid	0.0294	1.145	51.1
Randomized DsrA Plasmid	0.02911	0.974	64.7
Randomized DsrA Plasmid	0.0302	1.144	67.9
Randomized DsrA Plasmid	0.0316	1.175	61.2
Randomized DsrA Plasmid	0.03004	1.139	50.2
Randomized DsrA Plasmid	0.03075	1.185	64
Randomized DsrA Plasmid	0.0297	1.204	63.5
Randomized DsrA Plasmid	0.02736	1.094	77.7
Randomized DsrA Plasmid	0.03054	1.162	50.6
Randomized DsrA Plasmid	0.02979	1.145	60.2
Randomized DsrA Plasmid	0.02959	1.18	65.4
Randomized DsrA Plasmid	0.03112	1.175	54.9
Randomized DsrA Plasmid	0.03157	1.185	54.2
Randomized DsrA Plasmid	0.03536	1.182	53.6
Randomized DsrA Plasmid	0.0297	1.184	50.6
Randomized DsrA Plasmid	0.03322	1.27	64.8
Randomized DsrA Plasmid	0.03293	1.285	53.7
Randomized DsrA Plasmid	0.03186	1.062	61.7
Randomized DsrA Plasmid	0.03265	1.194	62.8
Randomized DsrA Plasmid	0.03308	1.172	61
Randomized DsrA Plasmid	0.02821	1.155	64
Randomized DsrA Plasmid	0.03156	1.125	61.3
Randomized DsrA Plasmid	0.03072	1.169	65.2
Randomized DsrA Plasmid	0.03143	1.187	63.1
Randomized DsrA Plasmid	0.02606	1.142	52.8
Randomized DsrA Plasmid	0.03111	1.149	54.4
Randomized DsrA Plasmid	0.02516	1.156	54.9
Randomized DsrA Plasmid	0.02743	1.146	52.2
Randomized DsrA Plasmid	0.02875	1.139	48.4
Randomized DsrA Plasmid	0.032	1.191	52.5
Randomized DsrA Plasmid	0.02986	1.194	77.3
Randomized DsrA Plasmid	0.02818	1.182	51.9
Randomized DsrA Plasmid	0.02789	1.175	73.6
Randomized DsrA Plasmid	0.02893	1.184	52
Randomized DsrA Plasmid	0.02728	1.181	52.8
Randomized DsrA Plasmid	0.02756	1.189	64.3
Randomized DsrA Plasmid	0.0284	1.167	62.2
Randomized DsrA Plasmid	0.02468	1.133	83.5
Randomized DsrA Plasmid	0.028	1.156	51.3
Randomized DsrA Plasmid	0.01865	1.197	67.5
Randomized DsrA Plasmid	0.03177	1.152	72.7
Randomized DsrA Plasmid	0.02746	0.953	50.3
Randomized DsrA Plasmid	0.01746	1.216	51.1
Randomized DsrA Plasmid	0.01893	1.154	50
Randomized DsrA Plasmid	0.03096	1.204	61.1
Randomized DsrA Plasmid	0.02714	1.083	70.5
Randomized DsrA Plasmid	0.0285	1.204	52.3
Randomized DsrA Plasmid	0.03272	1.213	51.9
Randomized DsrA Plasmid	0.02961	1.221	50.6
Randomized DsrA Plasmid	0.02668	1.193	81.2
Randomized DsrA Plasmid	0.02864	1.17	50.4
Randomized DsrA Plasmid	0.02106	1.218	51.6
Randomized DsrA Plasmid	0.02932	1.198	51.3
Randomized DsrA Plasmid	0.03037	1.113	74.7
Randomized DsrA Plasmid	0.03015	1.135	77.8
Randomized DsrA Plasmid	0.0302	1.138	53.3
Randomized DsrA Plasmid	0.03147	1.113	50.3
Randomized DsrA Plasmid	0.01803	0.883	56.1
Randomized DsrA Plasmid	0.0321	1.21	51.9
Randomized DsrA Plasmid	0.02939	1.027	48.2
Randomized DsrA Plasmid	0.03072	1.166	55.2
Randomized DsrA Plasmid	0.03437	1.131	49.2
Randomized DsrA Plasmid	0.02898	1.177	75.4
Randomized DsrA Plasmid	0.0317	1.156	52
Randomized DsrA Plasmid	0.03141	1.145	53.2
Randomized DsrA Plasmid	0.03105	1.098	73.7
Randomized DsrA Plasmid	0.03175	1.135	67.2
Randomized DsrA Plasmid	0.03086	1.114	51.9
Randomized DsrA Plasmid	0.02689	1.141	61.8
Randomized DsrA Plasmid	0.02982	1.174	77
Randomized DsrA Plasmid	0.01962	0.868	76.3
Randomized DsrA Plasmid	0.02746	1.129	60.3
Randomized DsrA Plasmid	0.0305	1.163	62.8
Randomized DsrA Plasmid	0.03105	1.149	53.3
Randomized DsrA Plasmid	0.02944	1.172	50.5
Randomized DsrA Plasmid	0.02903	0.887	64.1
Randomized DsrA Plasmid	0.02182	0.896	63.9
Randomized DsrA Plasmid	0.02782	1.215	60.2
Randomized DsrA Plasmid	0.03356	1.353	52.5
Randomized DsrA Plasmid	0.01962	1.03	53
Randomized DsrA Plasmid	0.0279	1.037	61
Randomized DsrA Plasmid	0.02923	1.171	62.7
Randomized DsrA Plasmid	0.02496	0.962	61.5
Randomized DsrA Plasmid	0.02336	1.021	60.8
Randomized DsrA Plasmid	0.03047	1.042	50.9
Randomized DsrA Plasmid	0.03605	1.047	50.7
Randomized DsrA Plasmid	0.03757	1.297	54.4
Randomized DsrA Plasmid	0.01924	1.231	60.9
Randomized DsrA Plasmid	0.02157	1.072	58.1
Randomized DsrA Plasmid	0.02282	1.229	53.3
Randomized DsrA Plasmid	0.02725	1.134	61.3
Randomized DsrA Plasmid	0.02215	1.082	65.5
Randomized DsrA Plasmid	0.02978	1.257	60.8
Randomized DsrA Plasmid	0.0186	1.286	64
Randomized DsrA Plasmid	0.0268	1.206	60
Randomized DsrA Plasmid	0.03947	1.472	64.7
Randomized DsrA Plasmid	0.03221	1.284	61.3
Randomized DsrA Plasmid	0.03716	1.379	60.33
Randomized DsrA Plasmid	0.03376	1.314	63.9
Randomized DsrA Plasmid	0.0277	1.237	65.1
Randomized DsrA Plasmid	0.02931	1.354	61.4
Randomized DsrA Plasmid	0.0298	1.167	64.2
Randomized DsrA Plasmid	0.0374	1.43	65.8
Randomized DsrA Plasmid	0.01636	1.003	60.2
Randomized DsrA Plasmid	0.02934	1.392	64.1
Randomized DsrA Plasmid	0.03882	1.497	64.5
Randomized DsrA Plasmid	0.02722	1.48	62.4
Randomized DsrA Plasmid	0.02208	1.154	62.1
Randomized DsrA Plasmid	0.0244	0.933	61.5
Randomized DsrA Plasmid	0.02562	1.132	64.8
Randomized DsrA Plasmid	0.02353	1.182	65.4
Randomized DsrA Plasmid	0.02828	1.281	76.8
Randomized DsrA Plasmid	0.03084	1.178	60.8
Randomized DsrA Plasmid	0.02885	1.32	63.9
Randomized DsrA Plasmid	0.03146	1.15	64.89
Randomized DsrA Plasmid	0.03291	1.074	46.8
Randomized DsrA Plasmid	0.02891	0.977	46.1
Randomized DsrA Plasmid	0.02274	1.187	81.2
Randomized DsrA Plasmid	0.03644	1.061	72.5
Randomized DsrA Plasmid	0.03274	1.169	66.4
Randomized DsrA Plasmid	0.02509	1.089	61.6
Randomized DsrA Plasmid	0.01952	0.887	61.6
Randomized DsrA Plasmid	0.0353	1.363	52.5
Randomized DsrA Plasmid	0.02407	0.939	61.4
Randomized DsrA Plasmid	0.03049	1.265	61.2
Randomized DsrA Plasmid	0.0281	1.2	92.8
Randomized DsrA Plasmid	0.02185	1.454	63
Randomized DsrA Plasmid	0.02946	1.153	61.5
Randomized DsrA Plasmid	0.03265	1.22	65.1
Randomized DsrA Plasmid	0.02624	1.446	64.2
Randomized DsrA Plasmid	0.03265	1.312	65.3
Randomized DsrA Plasmid	0.02906	1.039	54.2
Randomized DsrA Plasmid	0.03169	1.204	54.7
Randomized DsrA Plasmid	0.03753	1.305	61.1
Randomized DsrA Plasmid	0.02876	1.152	50.5
Randomized DsrA Plasmid	0.02601	0.88	60.6
Randomized DsrA Plasmid	0.02366	1.068	66.1
Randomized DsrA Plasmid	0.0263	1.01	50.9
Randomized DsrA Plasmid	0.02016	0.88	63.4
Randomized DsrA Plasmid	0.03419	1.322	90.8
Randomized DsrA Plasmid	0.03071	0.952	71.1
Randomized DsrA Plasmid	0.02901	1.11	80.3
Randomized DsrA Plasmid	0.02579	1.136	61.8
Randomized DsrA Plasmid	0.0295	1.279	62.6
Randomized DsrA Plasmid	0.03301	0.88	46.2
Randomized DsrA Plasmid	0.02272	0.918	63.3
Randomized DsrA Plasmid	0.03925	1.351	62
Randomized DsrA Plasmid	0.03983	1.057	60.5
Randomized DsrA Plasmid	0.02436	0.867	50.9
Randomized DsrA Plasmid	0.02193	0.954	60.6
Randomized DsrA Plasmid	0.03054	1.237	94.3
Randomized DsrA Plasmid	0.02778	0.884	71.2
Randomized DsrA Plasmid	0.02632	0.92	60.9
Randomized DsrA Plasmid	0.01862	0.876	60.2
Randomized DsrA Plasmid	0.02756	1.192	62.1
Randomized DsrA Plasmid	0.01705	0.868	53.1
Randomized DsrA Plasmid	0.02074	0.928	51.7
Randomized DsrA Plasmid	0.02073	1.269	93.9
Randomized DsrA Plasmid	0.03464	1.134	50.9
Randomized DsrA Plasmid	0.03689	1.196	52.2
Randomized DsrA Plasmid	0.03125	1.016	51.7
Randomized DsrA Plasmid	0.02916	1.262	51.7
Randomized DsrA Plasmid	0.02082	0.845	51.5
Randomized DsrA Plasmid	0.02698	1.044	53.4
Randomized DsrA Plasmid	0.03293	1.334	56.6
Randomized DsrA Plasmid	0.01479	0.929	70.9
Randomized DsrA Plasmid	0.0321	1.248	71
Randomized DsrA Plasmid	0.02873	1.148	90.8
Randomized DsrA Plasmid	0.03703	1.683	86
Randomized DsrA Plasmid	0.03033	1.161	84.6
Randomized DsrA Plasmid	0.01389	0.813	70.9
Randomized DsrA Plasmid	0.03257	1.172	60.5
Randomized DsrA Plasmid	0.03055	1.017	64.7
Randomized DsrA Plasmid	0.03315	1.177	75.1
Randomized DsrA Plasmid	0.03086	1.278	90.9
Randomized DsrA Plasmid	0.00817	0.821	70.9
Randomized DsrA Plasmid	0.02117	1.081	66
Randomized DsrA Plasmid	0.02415	1.128	83.2
Randomized DsrA Plasmid	0.02976	1.173	83.3
Randomized DsrA Plasmid	0.02851	1.13	61.5
Randomized DsrA Plasmid	0.02278	0.966	71.1
Randomized DsrA Plasmid	0.02639	1.167	61.3
Randomized DsrA Plasmid	0.02496	1.087	60.9
Randomized DsrA Plasmid	0.0253	1.113	55.2
Randomized DsrA Plasmid	0.03019	1.271	50.1
Randomized DsrA Plasmid	0.01752	0.964	90.2
Randomized DsrA Plasmid	0.02196	1.138	76.9
Randomized DsrA Plasmid	0.02232	1.148	54.1
Randomized DsrA Plasmid	0.03105	1.117	60.7
Randomized DsrA Plasmid	0.02411	1.001	60.4
Randomized DsrA Plasmid	0.01855	0.884	93.9
Randomized DsrA Plasmid	0.02832	1.061	62.2
Randomized DsrA Plasmid	0.02672	1.118	73.7
Randomized DsrA Plasmid	0.02555	1.072	96.1
Randomized DsrA Plasmid	0.03033	1.128	51.3
Randomized DsrA Plasmid	0.01335	0.986	82.3
Randomized DsrA Plasmid	0.02789	1.13	81.1
Randomized DsrA Plasmid	0.02484	1.027	71
Randomized DsrA Plasmid	0.03041	1.267	63.8
Randomized DsrA Plasmid	0.02368	1.332	71
Randomized DsrA Plasmid	0.02904	1.076	55.6
Randomized DsrA Plasmid	0.02537	1.17	65.4
Randomized DsrA Plasmid	0.03289	1.336	100.5
Randomized DsrA Plasmid	0.02959	1.224	72.1
Randomized DsrA Plasmid	0.03849	1.348	90.6
Randomized DsrA Plasmid	0.02612	1.142	71.4
Randomized DsrA Plasmid	0.02946	1.216	91
Randomized DsrA Plasmid	0.03058	1.305	92.9
Randomized DsrA Plasmid	0.02708	1.4	84.5
Randomized DsrA Plasmid	0.02574	1.124	74.9
Randomized DsrA Plasmid	0.02735	1.014	101.8
Randomized DsrA Plasmid	0.02268	1.219	92.3
Randomized DsrA Plasmid	0.03076	1.195	97.6
Randomized DsrA Plasmid	0.02758	1	72.2
Randomized DsrA Plasmid	0.02594	1.311	87.44
Randomized DsrA Plasmid	0.02173	1.313	89.8
Randomized DsrA Plasmid	0.03342	1.361	64.9
Randomized DsrA Plasmid	0.02137	0.906	70.5
Randomized DsrA Plasmid	0.02829	1.103	72.2
Randomized DsrA Plasmid	0.0244	0.998	90.3
Randomized DsrA Plasmid	0.02443	1.178	92.7
Randomized DsrA Plasmid	0.02219	1.294	96
Randomized DsrA Plasmid	0.03234	1.315	83.4
Randomized DsrA Plasmid	0.02516	1.142	61.9
Randomized DsrA Plasmid	0.02903	1.122	81.6
Randomized DsrA Plasmid	0.03204	1.222	71.3
Randomized DsrA Plasmid	0.02478	1.49	62.2
Randomized DsrA Plasmid	0.02465	1.061	65.3
Randomized DsrA Plasmid	0.03527	1.104	71
Randomized DsrA Plasmid	0.02763	1.024	62.7
Randomized DsrA Plasmid	0.02399	1.008	63.1
Randomized DsrA Plasmid	0.02278	0.93	64.6
Randomized DsrA Plasmid	0.02065	1.066	63.8
Randomized DsrA Plasmid	0.03179	1.116	63.2
Randomized DsrA Plasmid	0.02492	0.924	64.24
Randomized DsrA Plasmid	0.02701	1.19	61.8
Randomized DsrA Plasmid	0.02701	1.246	54.35
Randomized DsrA Plasmid	0.02604	1.095	54.3
Randomized DsrA Plasmid	0.02768	1.093	61.9
Randomized DsrA Plasmid	0.02228	1.173	64.7
Randomized DsrA Plasmid	0.01109	0.839	59.7
Randomized DsrA Plasmid	0.02543	1.06	75.2
Randomized DsrA Plasmid	0.00863	0.817	75.6
Randomized DsrA Plasmid	0.02272	0.979	72.5
Randomized DsrA Plasmid	0.02696	1.152	70.9
Randomized DsrA Plasmid	0.01633	1.251	64.5
Randomized DsrA Plasmid	0.01934	1.025	60.6
Randomized DsrA Plasmid	0.02563	1.02	51.7
Randomized DsrA Plasmid	0.02594	1.117	75.5
Randomized DsrA Plasmid	0.02383	1.038	65.3
Randomized DsrA Plasmid	0.03337	1.308	63.7
Randomized DsrA Plasmid	0.02709	1.116	50.9
Randomized DsrA Plasmid	0.0242	1.033	63.4
Randomized DsrA Plasmid	0.03286	1.213	55.1
Randomized DsrA Plasmid	0.02253	0.843	65
Randomized DsrA Plasmid	0.02813	1.131	53.2
Randomized DsrA Plasmid	0.02655	1.166	61.3
Randomized DsrA Plasmid	0.03585	1.395	62.2
Randomized DsrA Plasmid	0.01655	1.596	62.3
Randomized DsrA Plasmid	0.03013	1.109	64.9
Randomized DsrA Plasmid	0.0313	1.207	63.7
Randomized DsrA Plasmid	0.02815	1.055	71.5
Randomized DsrA Plasmid	0.00651	0.906	50.6
Randomized DsrA Plasmid	0.01911	0.841	50.6
Randomized DsrA Plasmid	0.03343	1.176	54.5
Randomized DsrA Plasmid	0.02612	1.11	64.4
Randomized DsrA Plasmid	0.03107	1.09	63
Randomized DsrA Plasmid	0.03238	1.207	61.2
Randomized DsrA Plasmid	0.01359	0.822	63.8
Randomized DsrA Plasmid	0.02449	0.89	61.4
Randomized DsrA Plasmid	0.03496	1.143	62.5
Randomized DsrA Plasmid	0.02559	0.896	64
Randomized DsrA Plasmid	0.0242	0.961	70.6
Randomized DsrA Plasmid	0.02052	1.266	64
Randomized DsrA Plasmid	0.03077	1.231	60.5
Randomized DsrA Plasmid	0.01755	1.097	71.2
Randomized DsrA Plasmid	0.02963	1.166	54.5
Randomized DsrA Plasmid	0.03037	1.14	70.5
Randomized DsrA Plasmid	0.02971	1.166	56.1
Randomized DsrA Plasmid	0.02472	0.981	73.9
Randomized DsrA Plasmid	0.02979	1.14	61.5
Randomized DsrA Plasmid	0.0269	1.161	63
Randomized DsrA Plasmid	0.03003	1.165	60.7
Randomized DsrA Plasmid	0.03097	1.178	61.4
Randomized DsrA Plasmid	0.02516	1.088	62.7
Randomized DsrA Plasmid	0.03159	1.128	50.4
Randomized DsrA Plasmid	0.03071	1.139	71
Randomized DsrA Plasmid	0.028	1.095	73.6
Randomized DsrA Plasmid	0.01891	1.231	60.8
Randomized DsrA Plasmid	0.03109	1.158	70.5
Randomized DsrA Plasmid	0.02563	1.059	61.4
Randomized DsrA Plasmid	0.04079	1.491	62.6
Randomized DsrA Plasmid	0.02714	1.017	51.1
Randomized DsrA Plasmid	0.02932	1.181	53.4
Randomized DsrA Plasmid	0.03212	1.165	51.6
Randomized DsrA Plasmid	0.02329	0.902	64.2
Randomized DsrA Plasmid	0.03243	1.179	72.6
Randomized DsrA Plasmid	0.02845	1.081	72.8
Randomized DsrA Plasmid	0.0246	0.989	50.5
Randomized DsrA Plasmid	0.02697	1.006	61.4
Randomized DsrA Plasmid	0.02407	0.968	71.9
Randomized DsrA Plasmid	0.03058	1.106	61.3
Randomized DsrA Plasmid	0.02705	1.434	53.4
Randomized DsrA Plasmid	0.03029	1.184	62.5
Randomized DsrA Plasmid	0.03161	1.195	57.7
Randomized DsrA Plasmid	0.02394	0.919	61.8
Randomized DsrA Plasmid	0.02858	1.098	64.5
Randomized DsrA Plasmid	0.03013	1.173	60.4
Randomized DsrA Plasmid	0.02384	0.93	87
Randomized DsrA Plasmid	0.03038	1.104	61.2
Randomized DsrA Plasmid	0.02266	0.903	50.5
Randomized DsrA Plasmid	0.02915	1.085	61.8
Randomized DsrA Plasmid	0.02189	0.912	60.4
Randomized DsrA Plasmid	0.02743	1.051	60.8
Randomized DsrA Plasmid	0.02956	1.1	71.6
Randomized DsrA Plasmid	0.03298	1.174	71.1
Randomized DsrA Plasmid	0.02054	0.904	85.3
Randomized DsrA Plasmid	0.02487	1.12	81.2
Randomized DsrA Plasmid	0.02971	1.081	80.9
Randomized DsrA Plasmid	0.01265	0.817	71.6
Randomized DsrA Plasmid	0.01797	1.207	70.6
Randomized DsrA Plasmid	0.0262	1.07	74.5
Randomized DsrA Plasmid	0.03183	1.138	85.1
Randomized DsrA Plasmid	0.0274	1.067	94.9
Randomized DsrA Plasmid	0.02458	1.058	83.7
Randomized DsrA Plasmid	0.03136	1.083	63.9
Randomized DsrA Plasmid	0.03034	1.161	55.4
Randomized DsrA Plasmid	0.03305	0.91	52.7
Randomized DsrA Plasmid	0.01444	0.826	55.1
Randomized DsrA Plasmid	0.01861	0.956	61.5
Randomized DsrA Plasmid	0.02691	1.058	64.8
Randomized DsrA Plasmid	0.02869	1.137	62.2
Randomized DsrA Plasmid	0.0268	1.204	59.9
Randomized DsrA Plasmid	0.00763	0.809	73.1
Randomized DsrA Plasmid	0.01889	0.86	64.3
Randomized DsrA Plasmid	0.03444	1.309	61.8
Randomized DsrA Plasmid	0.03433	1.067	60.6
Randomized DsrA Plasmid	0.02735	0.985	58.3
Randomized DsrA Plasmid	0.02953	1.058	60.4
Randomized DsrA Plasmid	0.02652	0.953	75.1
Randomized DsrA Plasmid	0.02997	1.156	53.4
Randomized DsrA Plasmid	0.02889	1.036	54.7
Randomized DsrA Plasmid	0.03062	1.009	61.6
Randomized DsrA Plasmid	0.02579	0.934	60
Randomized DsrA Plasmid	0.02845	1.051	71.5
Randomized DsrA Plasmid	0.03185	1.096	74.3
Randomized DsrA Plasmid	0.02093	0.832	51
Randomized DsrA Plasmid	0.03277	1.13	51.1
Randomized DsrA Plasmid	0.01797	0.877	50
Randomized DsrA Plasmid	0.02631	1.09	53.2
Randomized DsrA Plasmid	0.03031	1.137	95.4
Randomized DsrA Plasmid	0.03008	1.096	68
Randomized DsrA Plasmid	0.02076	0.988	50.6
Randomized DsrA Plasmid	0.02394	0.958	70.1
Randomized DsrA Plasmid	0.02953	1.077	70.8
Randomized DsrA Plasmid	0.02702	1.067	63.6
Randomized DsrA Plasmid	0.02501	1.069	53
Randomized DsrA Plasmid	0.02721	1.086	65.6
Randomized DsrA Plasmid	0.02733	1.034	60.6
Randomized DsrA Plasmid	0.02725	1.059	75.1
Randomized DsrA Plasmid	0.01711	1.088	59.3
Randomized DsrA Plasmid	0.02625	0.924	65.1
Randomized DsrA Plasmid	0.02993	0.99	55
Randomized DsrA Plasmid	0.02607	1.054	65
Randomized DsrA Plasmid	0.02662	1.087	60.3
Randomized DsrA Plasmid	0.02643	1.062	64.5
Randomized DsrA Plasmid	0.0259	0.949	65
Randomized DsrA Plasmid	0.02601	0.998	71.1
Randomized DsrA Plasmid	0.02251	0.994	74.2
Randomized DsrA Plasmid	0.0279	1.142	54.6
Randomized DsrA Plasmid	0.02788	1.04	73.2
Randomized DsrA Plasmid	0.03177	1.14	72.1
Randomized DsrA Plasmid	0.03055	1.082	53.3
Randomized DsrA Plasmid	0.02704	0.987	58.5
Randomized DsrA Plasmid	0.02595	1.063	67.6
Randomized DsrA Plasmid	0.02335	1.019	55.8
Randomized DsrA Plasmid	0.01562	1.065	53.2
Randomized DsrA Plasmid	0.02368	1.022	53.8
Randomized DsrA Plasmid	0.02906	1.086	70.6
Randomized DsrA Plasmid	0.01855	0.845	62
Randomized DsrA Plasmid	0.02997	1.044	71.1
Randomized DsrA Plasmid	0.03232	1.189	64.7
Randomized DsrA Plasmid	0.01361	0.85	75
Randomized DsrA Plasmid	0.02436	0.985	71.4
Randomized DsrA Plasmid	0.01305	0.863	61.8
Randomized DsrA Plasmid	0.01624	0.852	72.5
Randomized DsrA Plasmid	0.02453	0.98	73.3
Randomized DsrA Plasmid	0.01778	0.866	52.7
Randomized DsrA Plasmid	0.02424	0.993	55.8
Randomized DsrA Plasmid	0.02368	0.958	49.9
Randomized DsrA Plasmid	0.02641	0.968	91.9
Randomized DsrA Plasmid	0.02335	1.017	74
Randomized DsrA Plasmid	0.02818	0.992	84.6
Randomized DsrA Plasmid	0.02665	1.011	72
Randomized DsrA Plasmid	0.02525	1.003	63.7
Randomized DsrA Plasmid	0.01443	0.868	56.7
Randomized DsrA Plasmid	0.01939	0.952	95.9
Randomized DsrA Plasmid	0.00615	0.812	81.1
Randomized DsrA Plasmid	0.02625	1.118	63.5
Randomized DsrA Plasmid	0.03519	1.108	80.7
Randomized DsrA Plasmid	0.02397	0.99	60.5
Randomized DsrA Plasmid	0.02415	1.006	64.4
Randomized DsrA Plasmid	0.02154	0.97	65.5
Randomized DsrA Plasmid	0.01058	0.806	70.6
Randomized DsrA Plasmid	0.02106	0.911	73.7
Randomized DsrA Plasmid	0.00897	0.812	55.9
Randomized DsrA Plasmid	0.00897	0.866	51.3
Randomized DsrA Plasmid	0.02004	1.047	50.6
Randomized DsrA Plasmid	0.02007	1.015	52.5
Randomized DsrA Plasmid	0.02004	0.924	71.4
Randomized DsrA Plasmid	0.02089	0.908	71.2
Randomized DsrA Plasmid	0.02266	1.093	72.3
Randomized DsrA Plasmid	0.02243	0.95	62.4
Randomized DsrA Plasmid	0.02268	0.983	65.9
Randomized DsrA Plasmid	0.01889	1.073	60.8
Randomized DsrA Plasmid	0.01474	0.848	51.3
Randomized DsrA Plasmid	0.02496	0.859	60.7
Randomized DsrA Plasmid	0.03528	1.294	52.1
Randomized DsrA Plasmid	0.02897	1.051	65.8
Randomized DsrA Plasmid	0.02196	0.954	64.7
Randomized DsrA Plasmid	0.02089	1.007	55.4
Randomized DsrA Plasmid	0.02713	1.181	51.8
Randomized DsrA Plasmid	0.03587	1.184	53
Randomized DsrA Plasmid	0.02845	1.217	70.5
Randomized DsrA Plasmid	0.01448	1.115	52.2
Randomized DsrA Plasmid	0.02691	1.077	60.2
Randomized DsrA Plasmid	0.0339	1.217	75.3
Randomized DsrA Plasmid	0.03077	1.186	63.2
Randomized DsrA Plasmid	0.03071	1.235	60.6
Randomized DsrA Plasmid	0.02987	1.154	58.4
Randomized DsrA Plasmid	0.02675	0.948	68.9
Randomized DsrA Plasmid	0.03375	1.156	58.6
Randomized DsrA Plasmid	0.033	1.266	67.1
Randomized DsrA Plasmid	0.03352	1.265	50.7
Randomized DsrA Plasmid	0.02795	1.115	50.2
Randomized DsrA Plasmid	0.033	1.188	48.1
Randomized DsrA Plasmid	0.02021	1.297	54.9
Randomized DsrA Plasmid	0.03241	1.185	69.4
Randomized DsrA Plasmid	0.02213	1.253	77.7
Randomized DsrA Plasmid	0.0134	0.83	65.8
Randomized DsrA Plasmid	0.03051	1.224	67.9
Randomized DsrA Plasmid	0.02886	1.129	61.6
Randomized DsrA Plasmid	0.02639	1.037	50.7
Randomized DsrA Plasmid	0.02582	1.105	52.6
Randomized DsrA Plasmid	0.03268	1.283	55.9
Randomized DsrA Plasmid	0.03093	1.291	61.3
Randomized DsrA Plasmid	0.02859	1.181	71.1
Randomized DsrA Plasmid	0.03183	1.255	67.3
Randomized DsrA Plasmid	0.0309	1.188	62.9
Randomized DsrA Plasmid	0.0315	1.155	64.2
Randomized DsrA Plasmid	0.03059	1.231	60.3
Randomized DsrA Plasmid	0.03013	1.237	51.8
Randomized DsrA Plasmid	0.02026	1.26	63.7
Randomized DsrA Plasmid	0.03572	1.328	50.9
Randomized DsrA Plasmid	0.01329	0.917	65
Randomized DsrA Plasmid	0.02866	1.221	65.7
Randomized DsrA Plasmid	0.02364	1.042	70.4
Randomized DsrA Plasmid	0.0321	1.221	66.1
Randomized DsrA Plasmid	0.02743	1.051	57.6
Randomized DsrA Plasmid	0.02555	0.97	63.1
Randomized DsrA Plasmid	0.02436	0.997	76.2
Randomized DsrA Plasmid	0.03192	1.256	62.7
Randomized DsrA Plasmid	0.01825	1.195	75.7
Randomized DsrA Plasmid	0.02352	1.105	66.7
Randomized DsrA Plasmid	0.0392	1.339	52.8
Randomized DsrA Plasmid	0.0283	1.167	61
Randomized DsrA Plasmid	0.02971	1.062	60.4
Randomized DsrA Plasmid	0.02534	1.119	52.8
Randomized DsrA Plasmid	0.01509	1.15	70.8
Randomized DsrA Plasmid	0.02443	1.039	73.8
Randomized DsrA Plasmid	0.02488	1.165	60.6
Randomized DsrA Plasmid	0.02778	1.112	63.8
Randomized DsrA Plasmid	0.02515	0.952	60.5
Randomized DsrA Plasmid	0.03635	1.359	62.2
Randomized DsrA Plasmid	0.03146	1.216	61.2
Randomized DsrA Plasmid	0.02556	1.212	71.2
Randomized DsrA Plasmid	0.02243	1.091	74.2
Randomized DsrA Plasmid	0.01987	0.937	64.4
Randomized DsrA Plasmid	0.03382	1.096	72.2
Randomized DsrA Plasmid	0.02878	1.072	65.6
Randomized DsrA Plasmid	0.01963	0.965	50.8
Randomized DsrA Plasmid	0.03155	1.223	60.9
Randomized DsrA Plasmid	0.02731	1.074	64
Randomized DsrA Plasmid	0.02065	1.185	66.2
Randomized DsrA Plasmid	0.03142	1.253	63.7
Randomized DsrA Plasmid	0.0262	1.216	61.9
Randomized DsrA Plasmid	0.03009	1.328	60.8
Randomized DsrA Plasmid	0.03013	1.02	53.2
Randomized DsrA Plasmid	0.03239	1.165	50.3
Randomized DsrA Plasmid	0.03376	1.218	50.7
Randomized DsrA Plasmid	0.02939	1.148	50.23
Randomized DsrA Plasmid	0.03059	1.197	48.8
Randomized DsrA Plasmid	0.03057	1.168	53.1
Randomized DsrA Plasmid	0.03026	1.204	64.6
Randomized DsrA Plasmid	0.02831	1.193	61.1
Randomized DsrA Plasmid	0.03275	1.16	61.8
Randomized DsrA Plasmid	0.03252	1.139	60.8
Randomized DsrA Plasmid	0.03324	1.225	61.5
Randomized DsrA Plasmid	0.02111	0.858	50.4
Randomized DsrA Plasmid	0.01739	0.89	54.3
Randomized DsrA Plasmid	0.03261	1.165	55.7
Randomized DsrA Plasmid	0.02953	1.268	60.2
Randomized DsrA Plasmid	0.03457	1.206	53.33
Randomized DsrA Plasmid	0.03192	1.242	54.8
Randomized DsrA Plasmid	0.0127	0.836	50.6
Randomized DsrA Plasmid	0.01374	0.853	50.6
Randomized DsrA Plasmid	0.03517	1.248	65.8
Randomized DsrA Plasmid	0.03228	1.187	62.8
Randomized DsrA Plasmid	0.02799	1.37	61.5
Randomized DsrA Plasmid	0.0316	1.198	53.1
Randomized DsrA Plasmid	0.03274	1.084	65.1
Randomized DsrA Plasmid	0.03185	1.059	74.7
Randomized DsrA Plasmid	0.02908	1.186	71.1
Randomized DsrA Plasmid	0.01709	1.134	55.3
Randomized DsrA Plasmid	0.0193	1.192	50.5
Randomized DsrA Plasmid	0.02995	1.196	67.3
Randomized DsrA Plasmid	0.02486	1.001	51.3
Randomized DsrA Plasmid	0.02492	0.998	56.1
Randomized DsrA Plasmid	0.02577	1.019	51.6
Randomized DsrA Plasmid	0.02985	1.128	53.6
Randomized DsrA Plasmid	0.03142	1.151	52.6
Randomized DsrA Plasmid	0.03265	1.11	53.23
Randomized DsrA Plasmid	0.0319	1.066	57.3
Randomized DsrA Plasmid	0.02413	1.021	62.7
Randomized DsrA Plasmid	0.00846	0.819	51.75
Randomized DsrA Plasmid	0.03152	1.126	74.64
Randomized DsrA Plasmid	0.0255	1.006	72.5
Randomized DsrA Plasmid	0.02397	0.991	75.9
Randomized DsrA Plasmid	0.0254	1.05	84.4
Randomized DsrA Plasmid	0.02584	1.018	91.7
Randomized DsrA Plasmid	0.02411	1.043	65.2
Randomized DsrA Plasmid	0.02208	0.956	107.11
Randomized DsrA Plasmid	0.0329	1.189	81.9
Randomized DsrA Plasmid	0.03029	1.037	78.1
Randomized DsrA Plasmid	0.02968	1.1	90.8
Randomized DsrA Plasmid	0.02707	1.009	51.1
Randomized DsrA Plasmid	0.0207	0.945	80.5
Randomized DsrA Plasmid	0.03291	1.172	106.61
Randomized DsrA Plasmid	0.0323	1.17	60.4
Randomized DsrA Plasmid	0.02604	1.13	52.1
Randomized DsrA Plasmid	0.03077	1.151	55.5
Randomized DsrA Plasmid	0.0279	1.119	56.3
Randomized DsrA Plasmid	0.02098	0.949	53.1
Randomized DsrA Plasmid	0.02403	1.117	50.4
Randomized DsrA Plasmid	0.02353	1.19	66.9
Randomized DsrA Plasmid	0.02499	1.245	54.6
Randomized DsrA Plasmid	0.02736	1.052	51.5
Randomized DsrA Plasmid	0.03547	1.393	74.4
Randomized DsrA Plasmid	0.02817	1.047	77.4
Randomized DsrA Plasmid	0.03214	1.196	77.4
Randomized DsrA Plasmid	0.02247	0.964	58.3
Randomized DsrA Plasmid	0.02931	1.126	64.9
Randomized DsrA Plasmid	0.0246	0.985	76.3
Randomized DsrA Plasmid	0.02111	0.919	75.6
Randomized DsrA Plasmid	0.03212	1.215	61.1
Randomized DsrA Plasmid	0.03302	1.301	74.8
Randomized DsrA Plasmid	0.03461	1.244	51.7
Randomized DsrA Plasmid	0.02672	0.865	72.3
Randomized DsrA Plasmid	0.02778	1.231	105.1
Randomized DsrA Plasmid	0.02924	1.227	65.5
Randomized DsrA Plasmid	0.02047	1.24	66.1
Randomized DsrA Plasmid	0.02898	1.145	65.5
Randomized DsrA Plasmid	0.03568	1.401	75.8
Randomized DsrA Plasmid	0.01618	1.176	91.2
Randomized DsrA Plasmid	0.03138	1.162	91.9
Randomized DsrA Plasmid	0.03512	1.298	72.6
Randomized DsrA Plasmid	0.0363	1.257	71.5
Randomized DsrA Plasmid	0.03013	1.19	90.5
Randomized DsrA Plasmid	0.01174	0.848	97.4
Randomized DsrA Plasmid	0.03387	1.037	86.4
Randomized DsrA Plasmid	0.03186	1.207	96.4
Randomized DsrA Plasmid	0.03117	1.124	76.4
Randomized DsrA Plasmid	0.03022	1.172	80.7
Randomized DsrA Plasmid	0.02628	1.163	103.4
Randomized DsrA Plasmid	0.02908	1.195	105.8
Randomized DsrA Plasmid	0.0327	1.275	49.6
Randomized DsrA Plasmid	0.03069	1.094	77.3
Randomized DsrA Plasmid	0.0304	1.177	58.4
Randomized DsrA Plasmid	0.02845	1.069	96.9
Randomized DsrA Plasmid	0.03293	1.216	96.6
Randomized DsrA Plasmid	0.01905	0.846	87.4
Randomized DsrA Plasmid	0.0283	1.068	90.8
Randomized DsrA Plasmid	0.02906	1.155	90.7
Randomized DsrA Plasmid	0.03295	1.146	95.5
Randomized DsrA Plasmid	0.01835	1.146	103.45
Randomized DsrA Plasmid	0.02925	1.154	91.8
Randomized DsrA Plasmid	0.03761	1.325	80.8
Randomized DsrA Plasmid	0.00654	0.802	96.1
Randomized DsrA Plasmid	0.01389	0.823	92.4
Randomized DsrA Plasmid	0.02687	0.98	74.6
Randomized DsrA Plasmid	0.03396	1.259	73.9
Randomized DsrA Plasmid	0.01976	1.219	53.8
Randomized DsrA Plasmid	0.03122	1.063	71
Randomized DsrA Plasmid	0.03288	1.18	76.4
Randomized DsrA Plasmid	0.02813	1.174	71
Randomized DsrA Plasmid	0.02956	1.147	71.3
Randomized DsrA Plasmid	0.02878	1.112	72.3
Randomized DsrA Plasmid	0.03754	1.272	50.7
Randomized DsrA Plasmid	0.02128	0.919	74.6
Randomized DsrA Plasmid	0.014	0.82	70.6
Randomized DsrA Plasmid	0.03058	1.048	80.2
Randomized DsrA Plasmid	0.0307	1.272	52.5
Randomized DsrA Plasmid	0.02272	1.298	100
Randomized MicF Plasmid	0.03359	1.157	53.5
Randomized MicF Plasmid	0.02769	1.283	73.5
Randomized MicF Plasmid	0.02802	1.254	63.1
Randomized MicF Plasmid	0.03155	1.159	53.1
Randomized MicF Plasmid	0.03033	1.182	73.7
Randomized MicF Plasmid	0.02594	0.899	72.4
Randomized MicF Plasmid	0.02636	0.923	72.9
Randomized MicF Plasmid	0.02089	0.854	63
Randomized MicF Plasmid	0.033	1.231	104.3
Randomized MicF Plasmid	0.02723	1.152	88.2
Randomized MicF Plasmid	0.03089	1.148	64
Randomized MicF Plasmid	0.0278	1.181	95.2
Randomized MicF Plasmid	0.03053	1.156	93.2
Randomized MicF Plasmid	0.02689	1.206	79.5
Randomized MicF Plasmid	0.03223	1.187	72.8
Randomized MicF Plasmid	0.02854	1.087	83.5
Randomized MicF Plasmid	0.02703	1.202	96.3
Randomized MicF Plasmid	0.02851	0.959	92.5
Randomized MicF Plasmid	0.03175	1.161	82.5
Randomized MicF Plasmid	0.02465	0.924	102.7
Randomized MicF Plasmid	0.03336	0.801	103.9
Randomized MicF Plasmid	0.03342	1.155	62.9
Randomized MicF Plasmid	0.0285	1.215	55.6
Randomized MicF Plasmid	0.02923	1.145	54.7
Randomized MicF Plasmid	0.03002	1.181	63.5
Randomized MicF Plasmid	0.03068	1.176	53.4
Randomized MicF Plasmid	0.02525	1.006	95.9
Randomized MicF Plasmid	0.02982	1.087	92.8
Randomized MicF Plasmid	0.03189	1.165	92.6
Randomized MicF Plasmid	0.02218	0.858	92.7
Randomized MicF Plasmid	0.03033	1.144	93.3
Randomized MicF Plasmid	0.03476	1.212	92.2
Randomized MicF Plasmid	0.03158	1.223	83.8
Randomized MicF Plasmid	0.03102	1.059	62.9
Randomized MicF Plasmid	0.03104	1.256	65.3
Randomized MicF Plasmid	0.0294	1.176	82.9
Randomized MicF Plasmid	0.03088	1.202	83
Randomized MicF Plasmid	0.02875	1.153	82.7
Randomized MicF Plasmid	0.01891	1.16	77.9
Randomized MicF Plasmid	0.02766	1.235	63.1
Randomized MicF Plasmid	0.03204	1.193	64.9
Randomized MicF Plasmid	0.02909	1.101	83.6
Randomized MicF Plasmid	0.02745	1.115	74.1
Randomized MicF Plasmid	0.03161	1.178	52.8
Randomized MicF Plasmid	0.0263	1.177	94.5
Randomized MicF Plasmid	0.03175	1.196	73
Randomized MicF Plasmid	0.0316	1.217	82.7
Randomized MicF Plasmid	0.03098	1.174	73.9
Randomized MicF Plasmid	0.03297	1.212	82.2
Randomized MicF Plasmid	0.02443	1.159	64.4
Randomized MicF Plasmid	0.03131	1.17	92.5
Randomized MicF Plasmid	0.03314	1.205	92.2
Randomized MicF Plasmid	0.03214	1.225	74.2
Randomized MicF Plasmid	0.03227	1.217	83.5
Randomized MicF Plasmid	0.03376	1.255	63.4
Randomized MicF Plasmid	0.02608	1.157	85.7
Randomized MicF Plasmid	0.02993	1.233	74
Randomized MicF Plasmid	0.03214	1.275	73.4
Randomized MicF Plasmid	0.02689	1.168	83.8
Randomized MicF Plasmid	0.03117	1.184	73.7
Randomized MicF Plasmid	0.0294	1.22	84.1
Randomized MicF Plasmid	0.0286	1.13	75.6
Randomized MicF Plasmid	0.03062	1.201	90.1
Randomized MicF Plasmid	0.03061	1.201	54
Randomized MicF Plasmid	0.02893	1.144	83.3
Randomized MicF Plasmid	0.03245	1.159	82.3
Randomized MicF Plasmid	0.02828	1.179	66.5
Randomized MicF Plasmid	0.02639	1.156	65.1
Randomized MicF Plasmid	0.03123	1.219	76.8
Randomized MicF Plasmid	0.03066	1.202	82.5
Randomized MicF Plasmid	0.02962	1.165	74.6
Randomized MicF Plasmid	0.0317	1.149	52.3
Randomized MicF Plasmid	0.03206	1.172	52.6
Randomized MicF Plasmid	0.02569	1.209	76.1
Randomized MicF Plasmid	0.02714	1.124	94.4
Randomized MicF Plasmid	0.02644	1.153	56.3
Randomized MicF Plasmid	0.03074	1.164	83.8
Randomized MicF Plasmid	0.02713	1.164	54.4
Randomized MicF Plasmid	0.03117	1.156	53
Randomized MicF Plasmid	0.0325	1.159	92.8
Randomized MicF Plasmid	0.0269	1.172	95.3
Randomized MicF Plasmid	0.03201	1.041	82.6
Randomized MicF Plasmid	0.0306	1.05	83
Randomized MicF Plasmid	0.03447	1.212	82.5
Randomized MicF Plasmid	0.03272	1.231	92.5
Randomized MicF Plasmid	0.03165	1.154	53.7
Randomized MicF Plasmid	0.03172	1.167	82.8
Randomized MicF Plasmid	0.0334	1.204	112.5
Randomized MicF Plasmid	0.03046	1.205	56.3
Randomized MicF Plasmid	0.03279	1.144	113.2
Randomized MicF Plasmid	0.03212	1.185	102.7
Randomized MicF Plasmid	0.02845	1.105	62.9
Randomized MicF Plasmid	0.03289	1.065	63
Randomized MicF Plasmid	0.03166	1.172	62.7
Randomized MicF Plasmid	0.02567	1.192	59.6
Randomized MicF Plasmid	0.03069	1.206	52.9
Randomized MicF Plasmid	0.03144	1.166	62.3
Randomized MicF Plasmid	0.02921	1.22	64.9
Randomized MicF Plasmid	0.03168	1.172	62.4
Randomized MicF Plasmid	0.02714	1.171	65.8
Randomized MicF Plasmid	0.02984	1.204	53.5
Randomized MicF Plasmid	0.03008	1.167	63.5
Randomized MicF Plasmid	0.0321	1.158	72.4
Randomized MicF Plasmid	0.01826	0.838	73
Randomized MicF Plasmid	0.03152	1.149	64.7
Randomized MicF Plasmid	0.03178	1.204	64.5
Randomized MicF Plasmid	0.02908	1.227	63.3
Randomized MicF Plasmid	0.03027	1.184	75.8
Randomized MicF Plasmid	0.02799	1.173	65.9
Randomized MicF Plasmid	0.03043	1.148	65.8
Randomized MicF Plasmid	0.03096	1.179	82.9
Randomized MicF Plasmid	0.03092	1.16	82.9
Randomized MicF Plasmid	0.02631	1.171	63.8
Randomized MicF Plasmid	0.03082	1.19	73.5
Randomized MicF Plasmid	0.02958	1.145	83.7
Randomized MicF Plasmid	0.03069	1.223	59.4
Randomized MicF Plasmid	0.03138	1.216	58.1
Randomized MicF Plasmid	0.03232	1.206	57.5
Randomized MicF Plasmid	0.02989	1.184	58.2
Randomized MicF Plasmid	0.02692	1.181	63
Randomized MicF Plasmid	0.03026	1.128	87.3
Randomized MicF Plasmid	0.02397	0.958	99.7
Randomized MicF Plasmid	0.02813	1.121	58.8
Randomized MicF Plasmid	0.0315	1.178	78.4
Randomized MicF Plasmid	0.02967	1.17	69.3
Randomized MicF Plasmid	0.03019	1.206	59.1
Randomized MicF Plasmid	0.02567	1.025	101.7
Randomized MicF Plasmid	0.03168	1.141	78
Randomized MicF Plasmid	0.03284	1.27	88.5
Randomized MicF Plasmid	0.03174	1.269	78.6
Randomized MicF Plasmid	0.03059	1.233	59.5
Randomized MicF Plasmid	0.03104	1.223	80.3
Randomized MicF Plasmid	0.03223	1.222	57.3
Randomized MicF Plasmid	0.02932	1.195	58
Randomized MicF Plasmid	0.02515	1.221	69.6
Randomized MicF Plasmid	0.03189	1.242	77
Randomized MicF Plasmid	0.03059	1.224	58.5
Randomized MicF Plasmid	0.01752	1.197	76.9
Randomized MicF Plasmid	0.02821	1.233	71.9
Randomized MicF Plasmid	0.02676	0.797	97.7
Randomized MicF Plasmid	0.03174	1.263	63.6
Randomized MicF Plasmid	0.01911	0.881	94.2
Randomized MicF Plasmid	0.02828	1.185	86.4
Randomized MicF Plasmid	0.0176	1.217	88.1
Randomized MicF Plasmid	0.02007	1.22	78.1
Randomized MicF Plasmid	0.03061	1.237	67.5
Randomized MicF Plasmid	0.02898	1.197	74.7
Randomized MicF Plasmid	0.02459	1.216	59.4
Randomized MicF Plasmid	0.0285	1.206	63.3
Randomized MicF Plasmid	0.0285	1.165	65.3
Randomized MicF Plasmid	0.0169	1.199	58
Randomized MicF Plasmid	0.02996	1.219	55.9
Randomized MicF Plasmid	0.02885	1.181	63.8
Randomized MicF Plasmid	0.03476	1.223	72.5
Randomized MicF Plasmid	0.03074	1.194	63.8
Randomized MicF Plasmid	0.02921	1.171	62.4
Randomized MicF Plasmid	0.02655	1.115	97.1
Randomized MicF Plasmid	0.03177	1.185	72.7
Randomized MicF Plasmid	0.0294	1.137	93.1
Randomized MicF Plasmid	0.03099	1.198	62.7
Randomized MicF Plasmid	0.03153	1.185	62.7
Randomized MicF Plasmid	0.03197	1.134	62.3
Randomized MicF Plasmid	0.0284	1.159	64.9
Randomized MicF Plasmid	0.03064	1.211	93.1
Randomized MicF Plasmid	0.03061	1.222	76.4
Randomized MicF Plasmid	0.02978	1.187	64.9
Randomized MicF Plasmid	0.0332	1.174	72.4
Randomized MicF Plasmid	0.01862	1.172	78.1
Randomized MicF Plasmid	0.03053	1.139	92.8
Randomized MicF Plasmid	0.02039	1.173	78.1
Randomized MicF Plasmid	0.03223	1.173	62.7
Randomized MicF Plasmid	0.02993	1.156	85.8
Randomized MicF Plasmid	0.02342	0.878	92.6
Randomized MicF Plasmid	0.03225	1.093	92.5
Randomized MicF Plasmid	0.03312	1.171	92.4
Randomized MicF Plasmid	0.03216	0.976	62.9
Randomized MicF Plasmid	0.03423	1.219	72.6
Randomized MicF Plasmid	0.03037	1.26	64.5
Randomized MicF Plasmid	0.03382	1.249	62.4
Randomized MicF Plasmid	0.03114	1.177	63.1
Randomized MicF Plasmid	0.01714	0.849	95.1
Randomized MicF Plasmid	0.03155	1.167	73.5
Randomized MicF Plasmid	0.03175	1.187	72.6
Randomized MicF Plasmid	0.03026	1.078	74.2
Randomized MicF Plasmid	0.02869	1.17	64
Randomized MicF Plasmid	0.03509	1.099	73.2
Randomized MicF Plasmid	0.02643	1.023	64
Randomized MicF Plasmid	0.02826	1.027	62.3
Randomized MicF Plasmid	0.02258	0.905	82.8
Randomized MicF Plasmid	0.02878	1.054	62.2
Randomized MicF Plasmid	0.02866	1.064	73
Randomized MicF Plasmid	0.02764	1.049	73.5
Randomized MicF Plasmid	0.02749	1.051	83.4
Randomized MicF Plasmid	0.02713	1.066	93.3
Randomized MicF Plasmid	0.02565	1.042	73.8
Randomized MicF Plasmid	0.03073	1.12	62.6
Randomized MicF Plasmid	0.02282	0.883	84.1
Randomized MicF Plasmid	0.02921	1.088	64.9
Randomized MicF Plasmid	0.01681	1.097	68
Randomized MicF Plasmid	0.0282	1.105	75.2
Randomized MicF Plasmid	0.02643	1.067	65.2
Randomized MicF Plasmid	0.02369	1.062	59.2
Randomized MicF Plasmid	0.02761	1.06	62.5
Randomized MicF Plasmid	0.027	1.04	62.9
Randomized MicF Plasmid	0.02702	1.075	77
Randomized MicF Plasmid	0.02519	1.041	74.5
Randomized MicF Plasmid	0.02643	1.045	64.2
Randomized MicF Plasmid	0.02488	1.035	65.7
Randomized MicF Plasmid	0.02722	1.021	62.6
Randomized MicF Plasmid	0.02488	1.045	65.9
Randomized MicF Plasmid	0.02701	1.045	62.8
Randomized MicF Plasmid	0.02697	1.048	64
Randomized MicF Plasmid	0.02318	1.008	66.3
Randomized MicF Plasmid	0.01346	0.982	68
Randomized MicF Plasmid	0.02767	1.025	52.5
Randomized MicF Plasmid	0.02266	1.004	58.9
Randomized MicF Plasmid	0.0151	1.01	78
Randomized MicF Plasmid	0.02528	1.029	55.4
Randomized MicF Plasmid	0.02689	1.034	53.2
Randomized MicF Plasmid	0.02832	1.032	73
Randomized MicF Plasmid	0.02468	0.928	93.6
Randomized MicF Plasmid	0.0302	1.065	62.3
Randomized MicF Plasmid	0.02665	1.08	75
Randomized MicF Plasmid	0.02641	1.075	63.9
Randomized MicF Plasmid	0.02615	1.103	66
Randomized MicF Plasmid	0.02724	1.083	65
Randomized MicF Plasmid	0.0281	1.063	63.2
Randomized MicF Plasmid	0.0281	1.07	63.9
Randomized MicF Plasmid	0.02754	1.088	63.7
Randomized MicF Plasmid	0.0279	1.048	63
Randomized MicF Plasmid	0.0246	0.995	83.7
Randomized MicF Plasmid	0.02575	1.021	64.2
Randomized MicF Plasmid	0.01468	1.014	68.1
Randomized MicF Plasmid	0.02749	1.076	67.8
Randomized MicF Plasmid	0.0263	1.028	63.9
Randomized MicF Plasmid	0.02525	0.997	62.7
Randomized MicF Plasmid	0.02507	1.004	63.6
Randomized MicF Plasmid	0.0279	1.042	72.9
Randomized MicF Plasmid	0.02619	1.061	73.9
Randomized MicF Plasmid	0.02601	1.016	54.3
Randomized MicF Plasmid	0.02713	1.076	53.2
Randomized MicF Plasmid	0.03071	1.084	52.7
Randomized MicF Plasmid	0.02954	1.109	55
Randomized MicF Plasmid	0.02723	1.069	55
Randomized MicF Plasmid	0.02699	1.065	54.3
Randomized MicF Plasmid	0.01987	0.965	86.9
Randomized MicF Plasmid	0.02606	1.024	64.2
Randomized MicF Plasmid	0.02268	0.98	65.6
Randomized MicF Plasmid	0.02154	0.965	73.8
Randomized MicF Plasmid	0.02618	0.991	62.9
Randomized MicF Plasmid	0.02332	0.976	64.2
Randomized MicF Plasmid	0.02584	0.992	63.5
Randomized MicF Plasmid	0.0257	1.004	62.9
Randomized MicF Plasmid	0.02473	1.018	56.6
Randomized MicF Plasmid	0.01669	0.831	82.5
Randomized MicF Plasmid	0.02554	0.976	64
Randomized MicF Plasmid	0.02829	1.076	75.2
Randomized MicF Plasmid	0.02906	1.084	66.6
Randomized MicF Plasmid	0.02369	1.085	67.5
Randomized MicF Plasmid	0.02606	1.043	63.9
Randomized MicF Plasmid	0.02709	1.029	62.8
Randomized MicF Plasmid	0.02675	1.022	63.2
Randomized MicF Plasmid	0.02601	1.001	73.4
Randomized MicF Plasmid	0.02516	1.02	66.1
Randomized MicF Plasmid	0.02764	1.027	63.2
Randomized MicF Plasmid	0.02867	1.02	62.4
Randomized MicF Plasmid	0.02636	0.977	83.4
Randomized MicF Plasmid	0.01153	0.939	87.9
Randomized MicF Plasmid	0.02632	1	65.7
Randomized MicF Plasmid	0.02337	0.981	72.5
Randomized MicF Plasmid	0.01481	1.068	78
Randomized MicF Plasmid	0.02296	0.955	62.3
Randomized MicF Plasmid	0.02758	1.029	62.8
Randomized MicF Plasmid	0.02231	0.983	74
Randomized MicF Plasmid	0.02631	1.064	65.2
Randomized MicF Plasmid	0.02749	1.084	76.9
Randomized MicF Plasmid	0.02942	1.092	73.2
Randomized MicF Plasmid	0.02701	1.018	63.6
Randomized MicF Plasmid	0.02023	0.978	64.3
Randomized MicF Plasmid	0.03036	0.978	77.6
Randomized MicF Plasmid	0.03187	1.298	77.8
Randomized MicF Plasmid	0.02915	1.234	75.3
Randomized MicF Plasmid	0.03268	1.135	53.8
Randomized MicF Plasmid	0.02859	1.207	54.4
Randomized MicF Plasmid	0.03209	1.21	56.3
Randomized MicF Plasmid	0.03084	1.222	56.5
Randomized MicF Plasmid	0.03315	1.218	52.5
Randomized MicF Plasmid	0.03076	1.215	66
Randomized MicF Plasmid	0.03143	1.21	56.8
Randomized MicF Plasmid	0.0323	1.231	67.3
Randomized MicF Plasmid	0.03502	1.151	62.8
Randomized MicF Plasmid	0.03153	1.019	62.3
Randomized MicF Plasmid	0.03382	1.265	56.3
Randomized MicF Plasmid	0.03022	1.25	77
Randomized MicF Plasmid	0.03172	1.231	77.7
Randomized MicF Plasmid	0.03411	1.269	62.1
Randomized MicF Plasmid	0.02953	1.226	65.8
Randomized MicF Plasmid	0.03225	1.259	62.4
Randomized MicF Plasmid	0.03137	1.23	62.7
Randomized MicF Plasmid	0.02788	1.13	63.3
Randomized MicF Plasmid	0.02898	1.209	66.1
Randomized MicF Plasmid	0.03123	1.247	63.7
Randomized MicF Plasmid	0.03201	1.274	93.3
Randomized MicF Plasmid	0.0338	1.176	73.3
Randomized MicF Plasmid	0.01971	1.197	77.9
Randomized MicF Plasmid	0.03072	1.243	63.5
Randomized MicF Plasmid	0.0297	1.224	74.4
Randomized MicF Plasmid	0.0286	1.245	64.3
Randomized MicF Plasmid	0.03286	1.232	73.3
Randomized MicF Plasmid	0.0191	1.249	68.1
Randomized MicF Plasmid	0.0196	1.22	77.9
Randomized MicF Plasmid	0.03202	1.231	62.7
Randomized MicF Plasmid	0.0286	1.19	74.9
Randomized MicF Plasmid	0.02925	1.217	65.3
Randomized MicF Plasmid	0.02985	1.178	73.2
Randomized MicF Plasmid	0.02051	1.268	78
Randomized MicF Plasmid	0.02061	1.259	77.7
Randomized MicF Plasmid	0.03192	1.277	58.4
Randomized MicF Plasmid	0.03261	1.243	62.3
Randomized MicF Plasmid	0.01922	1.26	78
Randomized MicF Plasmid	0.02065	1.29	77.8
Randomized MicF Plasmid	0.03204	1.261	62.2
Randomized MicF Plasmid	0.03483	1.275	53.2
Randomized MicF Plasmid	0.03342	1.29	54.8
Randomized MicF Plasmid	0.03332	1.236	62.4
Randomized MicF Plasmid	0.02094	1.253	77.7
Randomized MicF Plasmid	0.03269	1.25	62.5
Randomized MicF Plasmid	0.03566	1.161	52.3
Randomized MicF Plasmid	0.03172	1.249	64.9
Randomized MicF Plasmid	0.03307	1.296	63.2
Randomized MicF Plasmid	0.03221	1.27	66
Randomized MicF Plasmid	0.03184	1.268	64
Randomized MicF Plasmid	0.03374	1.277	62.8
Randomized MicF Plasmid	0.03431	1.299	62.4
Randomized MicF Plasmid	0.02096	1.279	68.3
Randomized MicF Plasmid	0.03256	1.297	63.1
Randomized MicF Plasmid	0.03426	1.314	62.3
Randomized MicF Plasmid	0.03038	1.29	70
Randomized MicF Plasmid	0.03116	1.28	64.5
Randomized MicF Plasmid	0.03528	1.087	62.3
Randomized MicF Plasmid	0.02934	1.204	64.8
Randomized MicF Plasmid	0.03098	1.223	54.8
Randomized MicF Plasmid	0.03139	1.169	53.5
Randomized MicF Plasmid	0.0283	1.133	55.6
Randomized MicF Plasmid	0.02804	1.185	59.6
Randomized MicF Plasmid	0.03406	1.213	52.6
Randomized MicF Plasmid	0.03112	1.23	63.5
Randomized MicF Plasmid	0.03339	1.198	52.4
Randomized MicF Plasmid	0.03196	1.227	63.3
Randomized MicF Plasmid	0.0332	1.223	62.8
Randomized MicF Plasmid	0.02862	1.119	73.9
Randomized MicF Plasmid	0.00911	0.854	68.1
Randomized MicF Plasmid	0.02747	1.196	67.1
Randomized MicF Plasmid	0.03088	1.23	64.9
Randomized MicF Plasmid	0.02736	1.051	65.1
Randomized MicF Plasmid	0.03037	1.222	54.1
Randomized MicF Plasmid	0.0323	1.206	63.1
Randomized MicF Plasmid	0.03149	1.219	63.1
Randomized MicF Plasmid	0.03298	1.218	62.8
Randomized MicF Plasmid	0.02952	1.238	68.3
Randomized MicF Plasmid	0.02769	1.235	65.2
Randomized MicF Plasmid	0.02819	1.144	64.8
Randomized MicF Plasmid	0.03229	1.215	63
Randomized MicF Plasmid	0.0094	0.832	58.1
Randomized MicF Plasmid	0.02858	1.254	64.9
Randomized MicF Plasmid	0.03098	1.237	55.6
Randomized MicF Plasmid	0.02266	0.84	62.7
Randomized MicF Plasmid	0.03483	1.228	62.5
Randomized MicF Plasmid	0.0342	1.228	62.3
Randomized MicF Plasmid	0.02879	1.237	69.9
Randomized MicF Plasmid	0.0324	1.251	62.5
Randomized MicF Plasmid	0.02687	1.228	66
Randomized MicF Plasmid	0.01979	1.031	72.2
Randomized MicF Plasmid	0.03425	1.405	62.9
Randomized MicF Plasmid	0.03325	0.956	66
Randomized MicF Plasmid	0.028	1.09	55.5
Randomized MicF Plasmid	0.02939	0.985	65.6
Randomized MicF Plasmid	0.02593	1.09	54.4
Randomized MicF Plasmid	0.0216	0.972	82.3
Randomized MicF Plasmid	0.02455	1.134	76
Randomized MicF Plasmid	0.01905	0.864	64.1
Randomized MicF Plasmid	0.02004	0.956	93.5
Randomized MicF Plasmid	0.02364	0.987	87.3
Randomized MicF Plasmid	0.01979	0.987	94.3
Randomized MicF Plasmid	0.02904	1.053	72.8
Randomized MicF Plasmid	0.01548	1.05	98
Randomized MicF Plasmid	0.02212	0.968	83.1
Randomized MicF Plasmid	0.02076	0.957	74.2
Randomized MicF Plasmid	0.0298	1.106	72.8
Randomized MicF Plasmid	0.03199	1.13	63
Randomized MicF Plasmid	0.023	1.006	73.5
Randomized MicF Plasmid	0.01058	0.825	98.5
Randomized MicF Plasmid	0.01803	0.9	95.3
Randomized MicF Plasmid	0.0207	0.94	95.1
Randomized MicF Plasmid	0.02292	0.964	92.9
Randomized MicF Plasmid	0.02808	1.107	66.8
Randomized MicF Plasmid	0.01044	0.985	88.2
Randomized MicF Plasmid	0.02384	1.025	59.2
Randomized MicF Plasmid	0.02224	0.952	84.3
Randomized MicF Plasmid	0.01752	0.918	95.4
Randomized MicF Plasmid	0.02047	0.951	86.8
Randomized MicF Plasmid	0.02378	1.022	73.6
Randomized MicF Plasmid	0.01979	0.942	93.4
Randomized MicF Plasmid	0.00834	0.91	92.8
Randomized MicF Plasmid	0.02407	0.973	53.3
Randomized MicF Plasmid	0.01521	1.014	58
Randomized MicF Plasmid	0.00673	0.879	98.1
Randomized MicF Plasmid	0.01911	0.984	54.2
Randomized MicF Plasmid	0.02501	1.137	74.9
Randomized MicF Plasmid	0.02212	0.984	73.3
Randomized MicF Plasmid	0.02214	0.977	73.7
Randomized MicF Plasmid	0.02303	1.009	75.1
Randomized MicF Plasmid	0.02096	0.965	78.8
Randomized MicF Plasmid	0.01855	0.872	94
Randomized MicF Plasmid	0.02987	1.112	62.8
Randomized MicF Plasmid	0.023	0.961	78.33
Randomized MicF Plasmid	0.02166	0.917	52.6
Randomized MicF Plasmid	0.02243	0.969	80.4
Randomized MicF Plasmid	0.01752	0.908	96.5
Randomized MicF Plasmid	0.02031	1.108	55.5
Randomized MicF Plasmid	0.0248	0.989	73.3
Randomized MicF Plasmid	0.02106	0.979	74
Randomized MicF Plasmid	0.02203	0.989	72.5
Randomized MicF Plasmid	0.02565	1.07	54.6
[truncated: 2,080 more rows]

## Sheet: Secondary screen
Growth parameters for randomized sRNA constructs - secondary screen (Figure 3 and Figure S1)
Name	Mutants growth rate in LB	Mutants lag time in LB	Mutants growth rate in LB+CIP	Mutants lag time in LB+CIP	Non randomized Plasmid growth rate	Non randomized Plasmid lag time
Plasmid	0.067	56.7	0.05751	62.8	0.06238	43.4
Plasmid	0.05826	54.6	0.05268	64	0.059623	56.1
Plasmid	0.05838	53.6	0.05235	55.3	0.057313	44.4
Plasmid	0.05065	52.9	0.05189	55.6	0.064433	62.4
Plasmid	0.06149	53.2	0.05147	60.1	0.060483	45.3
Plasmid	0.0506	52.7	0.05206	64.1	0.053313	44.1
Plasmid	0.07114	42.7	0.0214	87.6	0.062233	46.2
Plasmid	0.05183	52.4	0.05672	63.8	0.058573	53.1
Plasmid	0.05999	52.6	0.05059	64.5	0.061193	56.6
Plasmid	0.05326	52.3	0.05168	62.8	0.060703	46.1
Plasmid	0.0612	53.4	0.05407	62.2	0.056353	42.4
Plasmid	0.05158	53.3	0.05356	62.4	0.055103	45.9
Plasmid	0.05785	49.9	0.05205	55.9	0.058873	45.1
Plasmid	0.05756	49.7	0.04855	59.9	0.063219	46
Plasmid	0.05418	50.7	0.04929	58.1	0.059473	43.3
Plasmid	0.06796	58.1	0.05032	63.4	0.053481	44.2
Plasmid	0.05738	48.2	0.05096	54.2	0.060332	43.5
Plasmid	0.05987	47.3	0.05343	53.5	0.058163	45.9
Plasmid	0.05445	49.5	0.05339	52.9	0.062856	42.8
Plasmid	0.05965	54.3	0.05522	56.6	0.059936	52.7
Plasmid	0.07087	48.6	0.02858	78.4	0.061285	53.8
Plasmid	0.05104	54.3	0.0495	56.8	0.062645	44.1
Plasmid	0.0524	52.2	0.05246	56.6	0.060482	53.1
Plasmid	0.05251	53.8	0.05055	60.5
Plasmid	0.0467	54.6	0.05007	63.5
Plasmid	0.05399	55	0.05141	62.5
Plasmid	0.05645	53.2	0.04754	56.6
Plasmid	0.05628	54	0.05264	62.6
Plasmid	0.0564	55.2	0.05122	63
Plasmid	0.05335	57.8	0.05215	62.6
Plasmid	0.06214	52.2	0.05218	62.7
Plasmid	0.05919	54	0.05327	62.4
Plasmid	0.05858	54.2	0.0497	57.9
Plasmid	0.0607	53.2	0.05977	58.1
Plasmid	0.07667	49.5	0.029	83.5
Plasmid	0.07767	48.7	0.0278	79.3
Plasmid	0.05325	53.2	0.05944	63.2
Plasmid	0.06064	58.1	0.05709	64.2
Plasmid	0.05809	54.8	0.04902	55.3
Plasmid	0.05878	44.3	0.05437	52.9
Plasmid	0.05838	52.6	0.04514	58.1
Plasmid	0.05223	56.5	0.04916	62.9
Plasmid	0.05334	54	0.05042	63.7
Plasmid	0.0595	53	0.05376	54
Plasmid	0.05125	52.4	0.0491	58.1
Plasmid	0.0568	59.7	0.05709	62.7
Plasmid	0.05709	57.2	0.04716	64.3
Plasmid	0.0579	55	0.04682	58
Plasmid	0.07618	51.12	0.04798	53.7
Plasmid	0.07149	48.62	0.02282	83.6
Plasmid	0.0498	66.4	0.04551	62.6
Plasmid	0.0569	56.1	0.04218	63
Plasmid	0.04942	57.3	0.05272	62.5
Plasmid	0.05374	57.1	0.04914	57.4
Plasmid	0.04863	57.5	0.04104	63.1
Plasmid	0.05262	45.1	0.04435	58
Plasmid	0.0514	53.7	0.05008	57.5
Plasmid	0.05204	52.5	0.05079	60.6
Plasmid	0.04902	54	0.04752	56.9
Plasmid	0.05267	52.5	0.05143	58.5
Plasmid	0.04988	50.2	0.04096	52.6
Plasmid	0.05879	55	0.05134	58.7
Plasmid	0.04896	57.6	0.04578	63.2
Plasmid	0.05853	55.4	0.04106	68
Plasmid	0.04859	56.2	0.05117	60.4
Plasmid	0.05183	53.4	0.05062	64
Plasmid	0.04821	53.4	0.04961	62.7
Plasmid	0.04878	56.3	0.05092	59.6
Plasmid	0.04951	53	0.04875	55.3
Plasmid	0.05189	52.7	0.0497	56.5
Plasmid	0.07376	50.98	0.0268	77.2
Plasmid	0.0501	53	0.04831	53.8
Plasmid	0.05405	52.5	0.05078	64.9
Plasmid	0.05105	58	0.05048	63.7
Plasmid	0.05052	54.6	0.0471	56.9
Plasmid	0.04916	53.3	0.04977	55.2
Plasmid	0.0487	54.1	0.04115	62.6
Plasmid	0.04992	53.1	0.04913	55.3
Plasmid	0.05797	58.1	0.05139	63.3
Plasmid	0.04884	63.3	0.04767	67.2
Plasmid	0.05031	62.4	0.04923	66.1
Plasmid	0.047	60.1	0.0466	61.9
Plasmid	0.0498	54.3	0.04458	63.1
Plasmid	0.05029	54.3	0.04417	62.4
Plasmid	0.05187	52.6	0.04802	62.6
Plasmid	0.04776	55.8	0.04301	58.8
Plasmid	0.05447	52.6	0.05269	58.7
Plasmid	0.05924	53.4	0.05263	56.5
Plasmid	0.05967	53.2	0.04977	55.2
Plasmid	0.05524	52.6	0.05249	55.4
Plasmid	0.05615	54.7	0.05195	63.7
Plasmid	0.05244	57	0.04014	62.4
Plasmid	0.05114	53.8	0.05234	63.8
Plasmid	0.04878	54.7	0.04585	59.1
Plasmid	0.0472	54.9	0.04847	64.6
Plasmid	0.05119	53.7	0.04465	59.2
Plasmid	0.05368	53.4	0.05026	56.3
Plasmid	0.05827	55.1	0.05269	55.6
Plasmid	0.04837	45.8	0.04784	57.7
Plasmid	0.0587	58.1	0.04581	56.1
Plasmid	0.04975	42.4	0.04571	62.7
Plasmid	0.05458	59.5	0.0488	63.1
Plasmid	0.05057	55.2	0.0464	63.1
Plasmid	0.05018	52.9	0.04733	62.8
Plasmid	0.04919	50.3	0.04601	60.3
Plasmid	0.04718	55.6	0.0491	63.5
Plasmid	0.04803	54.6	0.04589	61.8
Plasmid	0.05207	53.1	0.0455	61.2
Plasmid	0.04911	56.3	0.04635	58.1
Plasmid	0.04718	64.2	0.04509	65.4
Plasmid	0.0471	57.2	0.04726	64.8
Plasmid	0.05085	51.9	0.04819	52.9
Plasmid	0.04709	58.1	0.04843	63
Plasmid	0.04835	57.8	0.04152	63.2
Plasmid	0.04994	57.4	0.04063	62.5
Plasmid	0.07253	50.8	0.03003	86.8
Plasmid	0.05789	58	0.05675	61
Plasmid	0.05863	51.6	0.05606	59
Plasmid	0.05024	55.9	0.05739	60.3
Plasmid	0.04903	56.1	0.0481	64
Plasmid	0.05743	56.4	0.04934	62.2
Plasmid	0.05002	56	0.04667	58.1
Plasmid	0.07146	48	0.02859	97.2
Plasmid	0.05024	53.3	0.04553	58.1
Plasmid	0.06581	54.1	0.05483	63
Plasmid	0.0521	52.9	0.04456	65.8
Plasmid	0.06957	45.4	0.02538	85.2
Plasmid	0.07388	48.3	0.03123	83.7
Plasmid	0.05745	43.2	0.04971	52.7
Plasmid	0.05082	62.2	0.04581	72.7
Plasmid	0.0571	47.3	0.04911	53.1
Plasmid	0.05347	52.8	0.04043	58
Plasmid	0.0575	63.8	0.04044	64.8
Plasmid	0.05012	63.7	0.04897	64.2
Plasmid	0.0491	56.5	0.05015	60.4
Plasmid	0.04967	52.9	0.04738	52.5
Plasmid	0.04983	53.3	0.04711	64.7
Plasmid	0.04926	55.3	0.04653	62.3
Plasmid	0.06372	46.7	0.0471	50.7
Plasmid	0.0579	54.7	0.04771	63.1
Plasmid	0.05827	54.6	0.04847	62
Plasmid	0.0545	53.1	0.04778	58.5
Plasmid	0.05687	52.7	0.04135	55.6
Plasmid	0.05253	55.2	0.04452	62.9
Plasmid	0.05326	63.1	0.05159	62.7
Plasmid	0.04895	53.6	0.04802	60.2
Plasmid	0.06419	59.4	0.04873	62.2
Plasmid	0.06529	65.9	0.0564	67.5
Plasmid	0.04951	53.3	0.0467	63.1
Plasmid	0.05678	60.3	0.04498	60.8
Plasmid	0.05013	53.4	0.04383	58.2
Plasmid	0.05796	63.1	0.04831	63.5
Plasmid	0.07012	46.4	0.03096	86.5
Plasmid	0.05115	62.7	0.0428	64.9
Plasmid	0.04845	53.3	0.04045	59
Plasmid	0.04818	53.5	0.04336	54.1
Plasmid	0.04916	52.6	0.04098	60.2
Plasmid	0.06886	47.6	0.02386	83.2
Plasmid	0.05819	53.1	0.04857	66.6
Plasmid	0.04903	52.5	0.04772	53.5
Plasmid	0.04898	42.6	0.0461	55.6
Plasmid	0.05734	58.1	0.04982	62.9
Plasmid	0.06168	56.3	0.05806	63
Plasmid	0.06138	57	0.05867	60.4
Plasmid	0.04944	54.5	0.0426	62.4
Plasmid	0.0487	45.5	0.04457	54.5
Plasmid	0.0508	52.7	0.04339	62.4
Plasmid	0.04879	54.3	0.04785	63.6
Plasmid	0.04981	52.8	0.052	62.4
Plasmid	0.04944	52.6	0.04197	72.5
Plasmid	0.05896	63.8	0.0503	66.2
Plasmid	0.07595	49.8	0.03051	78.8
Plasmid	0.05585	55.4	0.03925	57.6
Plasmid	0.05607	54.7	0.05168	63
Plasmid	0.0601	53.2	0.04958	54.9
Plasmid	0.06525	51.9	0.05731	55
Plasmid	0.05586	52.9	0.054	53.7
Plasmid	0.05608	54.5	0.05294	67.8
Plasmid	0.05756	54.8	0.05972	64.6
Plasmid	0.0644	56.7	0.05257	64.7
Plasmid	0.05725	47.6	0.05478	52.2
Plasmid	0.05027	63.2	0.04237	63.7
Plasmid	0.0577	57.3	0.05237	62.9
Plasmid	0.07731	50.7	0.02731	84.6
Plasmid	0.04984	52.6	0.04285	58.1
Plasmid	0.04878	52.6	0.04315	57
Plasmid	0.04733	63.3	0.04209	64
Plasmid	0.05514	55.2	0.05367	56.3
Plasmid	0.05772	47.5	0.05312	54.9
Plasmid	0.05844	55.2	0.05422	59.7
Plasmid	0.06429	59.8	0.05446	63.7
Plasmid	0.06324	59.3	0.05519	60.4
Plasmid	0.05581	63.8	0.05087	66.6
Plasmid	0.05599	55.7	0.05008	63.9
Plasmid	0.0594	52.7	0.05373	55.4
Plasmid	0.0569	44.4	0.05494	53.6
Plasmid	0.0648	55.2	0.05938	57.8
Plasmid	0.05743	53.3	0.04969	63.3
Plasmid	0.0791	41.3	0.03123	79.5
Plasmid	0.05613	52.6	0.05139	63.3
Plasmid	0.05736	52.2	0.05096	62.8
Plasmid	0.06153	56.3	0.05274	62.8
Plasmid	0.05534	54.4	0.05112	58.5
Plasmid	0.04975	57.6	0.04643	63.5
Plasmid	0.06346	50.2	0.0595	65.9
Plasmid	0.05703	57.7	0.0549	58.1
Plasmid	0.05746	58.1	0.04219	64.4
Plasmid	0.0494	52.6	0.04723	64
Plasmid	0.06328	56.8	0.05879	58.6
Plasmid	0.06146	46.8	0.05519	56.3
Plasmid	0.06308	60.8	0.05784	62.6
Plasmid	0.05759	53.4	0.0499	62.4
Plasmid	0.04911	62.2	0.04697	63.5
Plasmid	0.04773	53.9	0.04532	63.6
Plasmid	0.06411	48	0.05675	52.7
Plasmid	0.06286	45.1	0.05265	54.6
Plasmid	0.05738	62.6	0.05575	63.3
Plasmid	0.04869	54.9	0.04613	58.2
Plasmid	0.04979	64.3	0.04739	64.7
Plasmid	0.05975	52.7	0.0506	57.4
Plasmid	0.04932	54.5	0.04917	63
Plasmid	0.05268	52.2	0.05054	62.4
Plasmid	0.05096	53.3	0.04712	57.6
Plasmid	0.05776	45.4	0.04853	53.5
Plasmid	0.05174	52.7	0.04998	62.4
Plasmid	0.05049	62.5	0.04508	65.1
Plasmid	0.05147	63.1	0.04612	65.2
Plasmid	0.05552	46.3	0.04536	52.5
Plasmid	0.05348	62.3	0.04316	64.5
Plasmid	0.05853	56.2	0.04159	57.9
Plasmid	0.05775	59.8	0.04438	64.5
Plasmid	0.04518	59.7	0.04956	62.7
Plasmid	0.05165	62.6	0.05068	64.6
Plasmid	0.0565	56.5	0.04974	62.3
Plasmid	0.05784	53.6	0.04632	57.6
Plasmid	0.05617	46.4	0.04855	52.6
Plasmid	0.05427	52.3	0.05093	62.5
Plasmid	0.05086	52.7	0.04923	63.1
Plasmid	0.04961	52.5	0.0454	57.4
Plasmid	0.07821	49.1	0.0304	95.2
Plasmid	0.07547	47.2	0.03029	92.5
Plasmid	0.05775	55.7	0.05602	62.3
Plasmid	0.05134	52.6	0.05012	57.4
Plasmid	0.05669	54.8	0.04957	58.7
Plasmid	0.05055	52.8	0.04858	61.8
Plasmid	0.04957	52.3	0.04771	56.6
Plasmid	0.04726	53.8	0.04246	63.4
Plasmid	0.06891	52.7	0.0291	95.2
Plasmid	0.05131	52.4	0.04749	58.9
Plasmid	0.0753	51.6	0.02955	87.1
Plasmid	0.07033	46.2	0.02417	98.1
Plasmid	0.07361	47.4	0.03058	93.6
Plasmid	0.06486	47.4	0.05203	63.2
Plasmid	0.06007	67	0.05801	73
Plasmid	0.07654	46.8	0.02187	87.9
Plasmid	0.06499	51.8	0.05008	62.6
Plasmid	0.04981	42.5	0.05039	48.5
Plasmid	0.0479	53	0.04529	56.1
Plasmid	0.05615	53	0.05098	62.5
Plasmid	0.0487	52.6	0.04526	62.3
Plasmid	0.05676	56.1	0.04832	60.8
Plasmid	0.06419	53.9	0.04851	58.1
Plasmid	0.06691	63.1	0.05084	63.6
Plasmid	0.05994	55.5	0.04547	59.1
Plasmid	0.05978	56.9	0.04839	62.9
Plasmid	0.05682	58.3	0.04808	63.3
Plasmid	0.06419	54.8	0.05857	64.8
Plasmid	0.05541	45.4	0.04941	63.3
Plasmid	0.05147	42.6	0.04995	62.4
Plasmid	0.05776	43.9	0.05448	57.3
Plasmid	0.06497	42.6	0.05693	57.6
Plasmid	0.05027	52.3	0.04831	58.1
Plasmid	0.04944	43	0.04687	56.5
Plasmid	0.04914	52.9	0.04006	63.9
Plasmid	0.0765	44.6	0.0274	90.1
Plasmid	0.05165	42.5	0.04701	54.3
Plasmid	0.06921	48.8	0.02121	87.5
Plasmid	0.05863	53.6	0.05727	62.6
Plasmid	0.07065	50.5	0.02575	93.5
Plasmid	0.05775	54.8	0.04705	63.5
Plasmid	0.07587	48.5	0.03094	78.3
Plasmid	0.07153	48.7	0.02727	83.5
Plasmid	0.07736	43.8	0.02527	77.8
Plasmid	0.07062	51.1	0.03207	88.1
Plasmid	0.06566	53.2	0.05705	62.9
Plasmid	0.05781	52.8	0.05105	63.6
Plasmid	0.06346	53.9	0.05586	55.4
Plasmid	0.06422	41.5	0.055	58.4
Plasmid	0.04758	59.9	0.04491	62.9
Plasmid	0.05736	52.5	0.05588	63.4
Plasmid	0.05501	54.6	0.04558	62.4
Plasmid	0.05967	54	0.05575	63.1
Plasmid	0.06338	53	0.05727	64.7
Plasmid	0.07369	52.3	0.02957	88.9
Plasmid	0.05218	43.6	0.05175	53.5
Plasmid	0.07384	49.8	0.02085	78.2
Plasmid	0.06103	53.3	0.05263	62.8
Plasmid	0.04978	42.6	0.04497	57.9
Plasmid	0.06053	52.3	0.05196	64
Plasmid	0.06457	62	0.05588	64.9
Plasmid	0.06118	55.5	0.05818	63.2
Plasmid	0.07759	46.7	0.02685	78
Plasmid	0.07732	51.9	0.02732	82.4
Plasmid	0.05369	57.6	0.04893	62.4
Plasmid	0.05432	53.2	0.0496	62.7
Plasmid	0.06231	56.6	0.05664	63.5
Plasmid	0.05895	47.3	0.05126	55.2
Plasmid	0.04983	54.6	0.04922	62.6
Plasmid	0.05628	51.8	0.04874	63.4
Plasmid	0.07674	48.8	0.02478	80.4
Plasmid	0.07378	48.2	0.03029	82.5
Plasmid	0.04971	62.8	0.04769	63
Plasmid	0.07547	48.6	0.02902	82.3
Plasmid	0.07752	49.2	0.03178	84.4
Plasmid	0.05736	62.7	0.05259	65.1
Plasmid	0.05538	57.6	0.04755	64.2
Plasmid	0.05966	55.2	0.05644	64.9
Plasmid	0.05564	57	0.04512	56.5
Plasmid	0.06465	56	0.05728	62.8
Plasmid	0.05472	43.7	0.05174	62.8
Plasmid	0.05625	62.3	0.05479	68
Plasmid	0.07645	46.8	0.02767	81.1
Plasmid	0.07561	46.2	0.03578	77.8
Plasmid	0.07086	52.3	0.0271	83.5
Plasmid	0.05779	53.8	0.05425	55.8
Plasmid	0.05719	52	0.05214	62.9
Plasmid	0.06638	57.9	0.05464	62.6
Plasmid	0.04934	62.1	0.04343	63.2
Plasmid	0.057	64.2	0.04402	65.5
Plasmid	0.04919	62.9	0.04551	63.4
Plasmid	0.04858	52.5	0.04274	63.1
Plasmid	0.05579	44.3	0.05113	48.1
Plasmid	0.05267	52.5	0.05012	60.7
Plasmid	0.05971	59.8	0.0501	61.3
Plasmid	0.0566	45	0.05051	60.4
Plasmid	0.04961	62.5	0.04074	65.1
Plasmid	0.05728	64.4	0.05065	65.2
Plasmid	0.05854	54.3	0.0501	65
Plasmid	0.04839	64.3	0.047	68.9
Plasmid	0.05951	54.9	0.05553	63
Plasmid	0.05784	52.5	0.04005	60.4
Plasmid	0.05934	53.2	0.04952	61.9
Plasmid	0.05205	52.9	0.05106	66.5
Plasmid	0.05596	55.4	0.05431	63.3
Plasmid	0.05983	48.9	0.05123	50.7
Plasmid	0.05652	44.2	0.05344	63.4
Plasmid	0.0753	49	0.0271	83.8
Plasmid	0.05794	53.6	0.05124	63.3
Plasmid	0.05044	53.2	0.04938	63.5
Plasmid	0.04969	62.5	0.0483	63.6
Plasmid	0.04986	53	0.0464	58.1
Plasmid	0.04938	52.2	0.04139	66.3
Plasmid	0.05654	44.2	0.04805	58.8
Plasmid	0.04934	62.8	0.04839	65.1
Plasmid	0.04887	43.8	0.03781	58
Plasmid	0.04564	60.3	0.04379	62.2
Plasmid	0.04822	62.4	0.04207	69.12
Plasmid	0.06387	64.9	0.05895	66.4
Plasmid	0.05858	62.2	0.04847	64.3
Plasmid	0.05608	63.1	0.05059	68.7
Plasmid	0.07907	42.3	0.02857	89.8
Plasmid	0.06538	56.3	0.05166	63.4
Plasmid	0.05132	53.5	0.0494	64.8
Plasmid	0.05529	57.9	0.05082	62.9
Plasmid	0.05616	55.4	0.04584	65.8
Plasmid	0.0588	54.4	0.05014	62.2
Plasmid	0.05671	58	0.05331	63.1
Plasmid	0.05093	56.9	0.0496	64.5
Plasmid	0.05582	58.1	0.04565	62.8
Plasmid	0.05124	62.4	0.04861	64.7
Plasmid	0.0509	62.5	0.04464	63.1
Plasmid	0.05043	53.9	0.04628	64.2
Plasmid	0.0506	53.6	0.0486	63.9
Plasmid	0.05207	62.2	0.04486	63
Plasmid	0.05739	57.3	0.05182	64.7
Plasmid	0.05756	56.1	0.04224	65.2
Plasmid	0.06101	55	0.04823	63.3
Plasmid	0.05678	53.3	0.04587	65.2
Plasmid	0.05628	55.9	0.04365	64.2
Plasmid	0.05559	55.7	0.0512	59.2
Plasmid	0.07351	46.6	0.03032	82.7
Plasmid	0.05494	54.3	0.05384	58.5
Plasmid	0.05638	65.4	0.05008	64
Plasmid	0.06253	53.6	0.05914	62.7
Plasmid	0.07429	47.5	0.03025	79.5
Plasmid	0.05812	58	0.04682	64.3
Plasmid	0.05924	65.4	0.04638	68.1
Plasmid	0.05834	55.6	0.05043	53.1
Plasmid	0.0557	56.2	0.04322	63.9
Plasmid	0.05415	52.5	0.04485	66.2
Plasmid	0.05189	52.2	0.04141	54.7
Plasmid	0.05837	47	0.0492	66.6
Plasmid	0.0615	52.6	0.05588	52.4
Plasmid	0.0631	57.4	0.04995	65
Plasmid	0.05617	57.6	0.04879	57.8
Plasmid	0.05714	63.7	0.05324	63.5
Plasmid	0.05852	53.5	0.05147	64.2
Plasmid	0.05529	55.3	0.05234	56.1
Plasmid	0.05605	52.4	0.05289	56.7
Plasmid	0.05197	55.8	0.05022	58.8
Plasmid	0.05753	53	0.05324	53.3
Plasmid	0.05217	55.7	0.04996	65
Plasmid	0.05895	56.6	0.05517	58.7
Plasmid	0.05916	56.5	0.05247	59.6
Plasmid	0.05731	52.8	0.05018	59.7
Plasmid	0.05625	53	0.05445	63.1
Plasmid	0.05936	56.5	0.05007	65
Plasmid	0.05691	55.3	0.0537	62.3
Plasmid	0.05017	57.4	0.05277	62.5
Plasmid	0.05739	53.3	0.05329	62.5
Plasmid	0.06041	53	0.05082	64.6
Plasmid	0.05748	54.8	0.0514	66.2
Plasmid	0.04709	55.9	0.0497	64.3
Plasmid	0.05871	64.3	0.05497	62.8
Plasmid	0.05965	53.8	0.05514	62.7
Plasmid	0.05859	53.1	0.05224	57.4
Plasmid	0.05745	54.9	0.05338	62.9
Plasmid	0.05922	53.5	0.05399	64.4
Plasmid	0.06086	52.6	0.055	63.3
Plasmid	0.06095	53.4	0.05337	63
Plasmid	0.05818	55.1	0.05402	64.6
Plasmid	0.06095	52.2	0.05169	55
Plasmid	0.0585	53.3	0.05623	53.1
Plasmid	0.05606	58	0.05331	67.5
Plasmid	0.0506	62.3	0.0466	63.5
Plasmid	0.0629	47.4	0.05673	57.4
Plasmid	0.05729	48.3	0.05688	58.3
Plasmid	0.05813	52.9	0.05244	62.9
Plasmid	0.05811	52.5	0.05323	62.5
Plasmid	0.0509	42.6	0.0484	62.6
Plasmid	0.0604	52.8	0.05041	62.8
Plasmid	0.05052	52.4	0.04763	62.4
Plasmid	0.0516	53.4	0.05081	62.6
Plasmid	0.07876	48.1	0.02834	85.4
Plasmid	0.05886	53.9	0.04813	54
Plasmid	0.04897	53.7	0.04772	54.9
Plasmid	0.04983	53.2	0.04808	58.2
Plasmid	0.05793	56.8	0.04855	58.6
Plasmid	0.04954	54.2	0.04782	63.6
Plasmid	0.04931	54	0.04755	65.8
Plasmid	0.05589	57.9	0.04834	63.7
Plasmid	0.05649	54	0.05372	64
Plasmid	0.05687	54.1	0.05161	62.9
Plasmid	0.05767	54.1	0.05007	60.4
Plasmid	0.05712	52.8	0.05046	55
Plasmid	0.06398	58	0.05279	62.3
Plasmid	0.05454	56.3	0.05188	54.9
Plasmid	0.04835	52.2	0.05253	62.5
Plasmid	0.05596	54.4	0.05057	54.2
Plasmid	0.05564	56.3	0.0518	63.3
Plasmid	0.05886	52.9	0.05313	62.4
Plasmid	0.05566	52.7	0.05159	62.6
Plasmid	0.05563	54.6	0.04778	55.8
Plasmid	0.05443	55.1	0.04899	65.6
Plasmid	0.06356	57.7	0.05971	58
Plasmid	0.05609	54.2	0.04665	65.7
Plasmid	0.05569	62.8	0.05023	64.6
Plasmid	0.04931	53.6	0.04878	56.1
Plasmid	0.05969	52.5	0.04965	54.2
Plasmid	0.04818	54	0.04763	63.5
Plasmid	0.06448	57.1	0.0593	63.7
Plasmid	0.05106	52.6	0.05028	53
Plasmid	0.05469	56.5	0.05213	63.3
Plasmid	0.05041	62.7	0.04923	65.6
Plasmid	0.05494	56.9	0.0507	62.3
Plasmid	0.05671	54.6	0.05299	62.2
Plasmid	0.05017	52.3	0.04964	61.1
Plasmid	0.05659	53.5	0.05195	62.8
Plasmid	0.05401	52.2	0.05213	62.2
Plasmid	0.04879	52.3	0.04978	63.4
Plasmid	0.07602	43.9	0.02531	78.9
Plasmid	0.05429	57.4	0.05208	53.7
Plasmid	0.05839	52.4	0.05162	62.7
Plasmid	0.05883	54	0.04854	55.1
Plasmid	0.05865	53.1	0.04906	54.5
Plasmid	0.05834	44	0.05258	52.4
Plasmid	0.05719	43.5	0.0466	53.3
Plasmid	0.05967	62.3	0.05033	52.8
Plasmid	0.04994	52.8	0.04841	54
Plasmid	0.05842	52.9	0.05	63.7
Plasmid	0.05454	45.1	0.05012	53.2
Plasmid	0.04825	43.4	0.04622	54.6
Plasmid	0.05607	46.4	0.05062	55.4
Plasmid	0.05718	56	0.04788	56.6
Plasmid	0.05994	52.4	0.05089	62.4
Plasmid	0.05771	54.4	0.05048	61.1
Plasmid	0.05735	48.1	0.04816	53.3
Plasmid	0.05736	51.8	0.05547	55
Plasmid	0.05863	43	0.05127	51.7
Plasmid	0.05832	52.3	0.05283	51.6
Plasmid	0.05981	42.6	0.05534	57.6
Plasmid	0.05116	42.5	0.04769	58.1
Plasmid	0.05616	53.7	0.05557	61.3
Plasmid	0.05843	55.4	0.05365	55.3
Plasmid	0.05552	47.9	0.05393	56.6
Plasmid	0.04863	55.1	0.04462	54.3
Plasmid	0.05758	66.4	0.05478	56.1
Plasmid	0.05912	46.6	0.05323	66.4
Plasmid	0.05886	45.3	0.05353	62.4
Plasmid	0.05506	52	0.05157	60.2
Plasmid	0.05806	46.6	0.05203	60.2
Plasmid	0.06947	47.3	0.02213	77.7
Plasmid	0.05607	55.3	0.05101	57.4
Plasmid	0.05267	47.4	0.04914	57
Plasmid	0.0625	47.2	0.05911	53.8
Plasmid	0.07137	49.1	0.02511	79.8
Plasmid	0.05965	54.6	0.05365	58.5
Plasmid	0.06004	55.3	0.04705	64.6
Plasmid	0.05649	50.2	0.05313	57.4
Plasmid	0.04776	54.6	0.05545	63.4
Plasmid	0.06157	46.5	0.0563	62.8
Plasmid	0.05657	53.3	0.05024	53.7
Plasmid	0.05699	56.9	0.05542	63.4
Plasmid	0.05825	42.8	0.05469	53.8
Plasmid	0.05811	43.8	0.05685	52.5
Plasmid	0.05638	42.9	0.05804	57.3
Plasmid	0.0568	36.4	0.05883	52.4
Plasmid	0.05308	42.1	0.05552	54.2
Plasmid	0.05949	57.7	0.05603	62.8
Plasmid	0.05104	57.1	0.04734	66.3
Plasmid	0.05951	56.6	0.05582	53.7
Plasmid	0.05874	55.8	0.05736	62.5
Plasmid	0.04868	45.4	0.04433	58
Plasmid	0.05018	47.2	0.04871	64.1
Plasmid	0.05125	57.3	0.05517	57
Plasmid	0.05514	56.7	0.05154	64.5
Plasmid	0.05802	51.7	0.0556	62.4

## Sheet: Selected constructs
Growth parameters for 48 sRNA constructs of interest (blue in Figure 3)
Plasmid	GR_Control	Lag time_Control	Growth rate	Lag time
DsrA1 A1	0.06921	48.8	0.02121	87.5
DsrA2 B11	0.07602	43.9	0.02531	78.9
DsrA2 B12	0.07137	49.1	0.02511	79.8
DsrA2 C1	0.07361	47.4	0.03058	93.6
DsrA2 C6	0.07065	50.5	0.02575	93.5
DsrA2 C10	0.07754	46.8	0.02187	87.9
DsrA2 C11	0.07587	48.5	0.03094	78.3
DsrA2 D4	0.07153	48.7	0.02727	83.5
DsrA2 D11	0.07369	52.3	0.02957	88.9
DsrA2 E1	0.07384	49.8	0.02085	78.2
DsrA2 E2	0.07062	51.1	0.03207	88.1
DsrA2 E7	0.07759	46.7	0.02685	78
DsrA2 E12	0.07732	51.9	0.02732	82.4
DsrA3 A8	0.07674	48.8	0.02478	80.4
DsrA3 B8	0.07378	48.2	0.03029	82.5
DsrA3 C7	0.07547	48.6	0.02902	82.3
DsrA3 D2	0.07652	49.2	0.03178	84.4
DsrAA3 D5	0.07907	42.3	0.02857	89.8
DsrA3 E2	0.0765	44.6	0.0274	90.1
MicF1 C9	0.07645	46.8	0.02767	81.1
MicF1 C10	0.07736	43.8	0.02527	77.8
MicF1 C12	0.07086	52.3	0.0271	83.5
MicF1 D5	0.07065	50.5	0.02575	93.5
MicF1 D7	0.0753	49	0.0271	83.8
MicF1 D8	0.0753	51.6	0.02955	87.1
MicF1 D10	0.07033	46.2	0.02417	98.1
MicF1 D11	0.07351	46.6	0.03032	82.7
MicF1 D12	0.06891	52.7	0.0291	95.2
MicF1 E2	0.07429	47.5	0.03025	79.5
MicF1 E3	0.06957	45.4	0.02538	85.2
MicF1 E4	0.07388	48.3	0.03123	83.7
MicF1 F8	0.07087	48.6	0.02858	78.4
MicF1 F11	0.07667	49.5	0.029	83.5
MicF1 F12	0.07767	48.7	0.0278	79.3
MicF1 G1	0.06947	47.3	0.02213	77.7
MicF1 G2	0.07149	48.62	0.02282	83.6
MicF1 G3	0.07376	50.98	0.0268	77.2
MicF1 G5	0.07253	50.8	0.03003	86.8
MicF1 G6	0.07146	48	0.02859	97.2
MicF1 G7	0.07012	46.4	0.03096	86.5
MicF1 G8	0.06886	47.6	0.02386	83.2
MicF1 G11	0.07595	49.8	0.03051	78.8
MicF2 E10	0.07731	50.7	0.02731	84.6
MicF3 F10	0.07876	48.1	0.02834	85.4
Spot2 A9	0.0791	41.3	0.03123	79.5
Spot2 B5	0.07821	49.1	0.0304	95.2
Spot2 C5	0.07547	47.2	0.03029	92.5
Spot5 D8	0.07114	42.7	0.0214	87.6
